# Supplementary material for: A new stable monomeric lead(ii) dithiolate Pb(SCH2CH2NMe2)2: an interplay between a dynamic “flip-flop” process in solution and conformational isomerism in the solid-state
Source: Royal Society of Chemistry journal article supplement (doi:10.1039/c0dt00783h), 2010-01-01
Supplement: c0dt00783h.pdf [file c0dt00783h.pdf]

## **Supplementary Information**

for the article

### **A New Stable Monomeric Lead(II) Dithiolate $\text{Pb}(\text{SCH}_2\text{CH}_2\text{NMe}_2)_2$ : An Interplay Between Dynamic “*Flip-Flop*” Process in Solution and Conformational Isomerism in the Solid-State**

*Victor N. Khrustalev,<sup>a,\*</sup> Rinat R. Aysin,<sup>a</sup> Irina V. Borisova,<sup>b</sup> Alexander S. Peregudov,<sup>a</sup>  
Larissa A. Leites,<sup>a</sup> and Nikolai N. Zemlyansky<sup>b</sup>*

<sup>a</sup> Nesmeyanov Institute of Organoelement Compounds, Russian Academy of Sciences,  
Moscow, Russia

<sup>b</sup> Topchiev Institute of Petrochemical Synthesis, Russian Academy of Sciences, Moscow,  
Russia

#### **CONTENTS**

|                                                                   |       |
|-------------------------------------------------------------------|-------|
| 1. X-ray structure analysis of <b>4</b> at different temperatures | 2-22  |
| 2. Multi-nuclear and variable-temperature NMR spectra             | 23-32 |
| 3. Variable-temperature IR spectra of solid <b>4</b>              | 33    |
| 4. Details of DFT calculations                                    | 34-36 |

**Table S1.** Crystal data and structure refinement for **4\_LT**.

|                                                 |                                                                     |          |
|-------------------------------------------------|---------------------------------------------------------------------|----------|
| Identification code                             | <b>Pb(SCH<sub>2</sub>CH<sub>2</sub>NMe<sub>2</sub>)<sub>2</sub></b> |          |
| Empirical formula                               | C <sub>8</sub> H <sub>20</sub> N <sub>2</sub> Pb S <sub>2</sub>     |          |
| Formula weight                                  | 415.57                                                              |          |
| Temperature                                     | 100(2) K                                                            |          |
| Wavelength                                      | 0.71073 Å                                                           |          |
| Crystal system                                  | Orthorhombic                                                        |          |
| Space group                                     | P2 <sub>1</sub> 2 <sub>1</sub> 2 <sub>1</sub>                       |          |
| Unit cell dimensions                            | a = 10.3938(5) Å                                                    | α = 90°. |
|                                                 | b = 10.7759(5) Å                                                    | β = 90°. |
|                                                 | c = 11.4619(6) Å                                                    | γ = 90°. |
| Volume                                          | 1283.76(11) Å <sup>3</sup>                                          |          |
| Z                                               | 4                                                                   |          |
| Density (calculated)                            | 2.150 Mg/m <sup>3</sup>                                             |          |
| Absorption coefficient                          | 13.432 mm <sup>-1</sup>                                             |          |
| F(000)                                          | 784                                                                 |          |
| Crystal size                                    | 0.15 x 0.12 x 0.10 mm <sup>3</sup>                                  |          |
| Theta range for data collection                 | 2.72 to 30.61°.                                                     |          |
| Index ranges                                    | -14 ≤ h ≤ 14, -15 ≤ k ≤ 15, -16 ≤ l ≤ 16                            |          |
| Reflections collected                           | 16634                                                               |          |
| Independent reflections                         | 3889 [R(int) = 0.0284]                                              |          |
| Completeness to theta = 30.61°                  | 98.0 %                                                              |          |
| Absorption correction                           | Semi-empirical from equivalents                                     |          |
| Max. and min. transmission                      | 0.347 and 0.238                                                     |          |
| Refinement method                               | Full-matrix least-squares on F <sup>2</sup>                         |          |
| Data / restraints / parameters                  | 3889 / 0 / 122                                                      |          |
| Goodness-of-fit on F <sup>2</sup>               | 0.936                                                               |          |
| Final R indices [for 3417 rflns with I > 2σ(I)] | R1 = 0.0185, wR2 = 0.0365                                           |          |
| R indices (all data)                            | R1 = 0.0239, wR2 = 0.0379                                           |          |
| Absolute structure parameter                    | 0.004(5)                                                            |          |
| Largest diff. peak and hole                     | 1.412 and -0.877 e.Å <sup>-3</sup>                                  |          |

**Table S2.** Atomic coordinates ( $\times 10^4$ ) and equivalent isotropic displacement parameters ( $\text{\AA}^2 \times 10^3$ ) for **4\_LT**.  $U(\text{eq})$  is defined as one third of the trace of the orthogonalized  $U_{ij}$  tensor.

| Atom  | x       | y       | z       | U(eq) |
|-------|---------|---------|---------|-------|
| Pb(1) | 4100(1) | 4964(1) | 7480(1) | 15(1) |
| S(1)  | 3875(1) | 3467(1) | 5681(1) | 18(1) |
| S(2)  | 4194(1) | 6980(1) | 6179(1) | 19(1) |
| N(1)  | 1627(2) | 5047(3) | 7025(2) | 17(1) |
| N(2)  | 6550(3) | 5182(3) | 7043(2) | 16(1) |
| C(1)  | 2129(3) | 3514(3) | 5456(3) | 20(1) |
| C(2)  | 1486(3) | 4732(3) | 5790(3) | 19(1) |
| C(3)  | 990(3)  | 4124(3) | 7800(3) | 24(1) |
| C(4)  | 1073(3) | 6287(3) | 7265(3) | 20(1) |
| C(5)  | 5769(3) | 6657(3) | 5531(3) | 21(1) |
| C(6)  | 6774(3) | 6379(3) | 6433(3) | 18(1) |
| C(7)  | 7175(3) | 5187(3) | 8184(3) | 20(1) |
| C(8)  | 7008(3) | 4127(3) | 6332(3) | 21(1) |

**Table S3.** Bond lengths [Å] and angles [°] for **4\_LT**.

|                 |            |                  |            |
|-----------------|------------|------------------|------------|
| Pb(1)-N(2)      | 2.607(3)   | C(3)-H(3A)       | 0.9800     |
| Pb(1)-N(1)      | 2.623(2)   | C(3)-H(3B)       | 0.9800     |
| Pb(1)-S(1)      | 2.6283(8)  | C(3)-H(3C)       | 0.9800     |
| Pb(1)-S(2)      | 2.6370(8)  | C(4)-H(4A)       | 0.9800     |
| S(1)-C(1)       | 1.834(4)   | C(4)-H(4B)       | 0.9800     |
| S(2)-C(5)       | 1.831(3)   | C(4)-H(4C)       | 0.9800     |
| N(1)-C(2)       | 1.464(4)   | C(5)-C(6)        | 1.499(4)   |
| N(1)-C(4)       | 1.481(4)   | C(5)-H(5A)       | 0.9900     |
| N(1)-C(3)       | 1.489(4)   | C(5)-H(5B)       | 0.9900     |
| N(2)-C(7)       | 1.460(4)   | C(6)-H(6A)       | 0.9900     |
| N(2)-C(8)       | 1.478(4)   | C(6)-H(6B)       | 0.9900     |
| N(2)-C(6)       | 1.485(4)   | C(7)-H(7A)       | 0.9800     |
| C(1)-C(2)       | 1.522(4)   | C(7)-H(7B)       | 0.9800     |
| C(1)-H(1A)      | 0.9900     | C(7)-H(7C)       | 0.9800     |
| C(1)-H(1B)      | 0.9900     | C(8)-H(8A)       | 0.9800     |
| C(2)-H(2A)      | 0.9900     | C(8)-H(8B)       | 0.9800     |
| C(2)-H(2B)      | 0.9900     | C(8)-H(8C)       | 0.9800     |
| N(2)-Pb(1)-N(1) | 156.33(8)  | C(6)-N(2)-Pb(1)  | 108.77(18) |
| N(2)-Pb(1)-S(1) | 89.49(6)   | C(2)-C(1)-S(1)   | 115.0(2)   |
| N(1)-Pb(1)-S(1) | 77.18(6)   | C(2)-C(1)-H(1A)  | 108.5      |
| N(2)-Pb(1)-S(2) | 77.33(6)   | S(1)-C(1)-H(1A)  | 108.5      |
| N(1)-Pb(1)-S(2) | 84.03(6)   | C(2)-C(1)-H(1B)  | 108.5      |
| S(1)-Pb(1)-S(2) | 93.73(2)   | S(1)-C(1)-H(1B)  | 108.5      |
| C(1)-S(1)-Pb(1) | 100.44(11) | H(1A)-C(1)-H(1B) | 107.5      |
| C(5)-S(2)-Pb(1) | 96.08(10)  | N(1)-C(2)-C(1)   | 113.5(3)   |
| C(2)-N(1)-C(4)  | 110.4(2)   | N(1)-C(2)-H(2A)  | 108.9      |
| C(2)-N(1)-C(3)  | 112.2(3)   | C(1)-C(2)-H(2A)  | 108.9      |
| C(4)-N(1)-C(3)  | 108.6(2)   | N(1)-C(2)-H(2B)  | 108.9      |
| C(2)-N(1)-Pb(1) | 106.41(18) | C(1)-C(2)-H(2B)  | 108.9      |
| C(4)-N(1)-Pb(1) | 112.0(2)   | H(2A)-C(2)-H(2B) | 107.7      |
| C(3)-N(1)-Pb(1) | 107.15(18) | N(1)-C(3)-H(3A)  | 109.5      |
| C(7)-N(2)-C(8)  | 110.7(3)   | N(1)-C(3)-H(3B)  | 109.5      |
| C(7)-N(2)-C(6)  | 110.4(3)   | H(3A)-C(3)-H(3B) | 109.5      |
| C(8)-N(2)-C(6)  | 111.0(3)   | N(1)-C(3)-H(3C)  | 109.5      |
| C(7)-N(2)-Pb(1) | 105.22(18) | H(3A)-C(3)-H(3C) | 109.5      |
| C(8)-N(2)-Pb(1) | 110.59(19) | H(3B)-C(3)-H(3C) | 109.5      |

|                  |          |                  |       |
|------------------|----------|------------------|-------|
| N(1)-C(4)-H(4A)  | 109.5    | N(2)-C(6)-H(6B)  | 109.0 |
| N(1)-C(4)-H(4B)  | 109.5    | C(5)-C(6)-H(6B)  | 109.0 |
| H(4A)-C(4)-H(4B) | 109.5    | H(6A)-C(6)-H(6B) | 107.8 |
| N(1)-C(4)-H(4C)  | 109.5    | N(2)-C(7)-H(7A)  | 109.5 |
| H(4A)-C(4)-H(4C) | 109.5    | N(2)-C(7)-H(7B)  | 109.5 |
| H(4B)-C(4)-H(4C) | 109.5    | H(7A)-C(7)-H(7B) | 109.5 |
| C(6)-C(5)-S(2)   | 112.4(2) | N(2)-C(7)-H(7C)  | 109.5 |
| C(6)-C(5)-H(5A)  | 109.1    | H(7A)-C(7)-H(7C) | 109.5 |
| S(2)-C(5)-H(5A)  | 109.1    | H(7B)-C(7)-H(7C) | 109.5 |
| C(6)-C(5)-H(5B)  | 109.1    | N(2)-C(8)-H(8A)  | 109.5 |
| S(2)-C(5)-H(5B)  | 109.1    | N(2)-C(8)-H(8B)  | 109.5 |
| H(5A)-C(5)-H(5B) | 107.9    | H(8A)-C(8)-H(8B) | 109.5 |
| N(2)-C(6)-C(5)   | 112.9(3) | N(2)-C(8)-H(8C)  | 109.5 |
| N(2)-C(6)-H(6A)  | 109.0    | H(8A)-C(8)-H(8C) | 109.5 |
| C(5)-C(6)-H(6A)  | 109.0    | H(8B)-C(8)-H(8C) | 109.5 |

---

**Table S4.** Anisotropic displacement parameters ( $\text{\AA}^2 \times 10^3$ ) for **4\_LT**. The anisotropic displacement factor exponent takes the form:  $-2\pi^2 [ h^2 a^{*2} U^{11} + \dots + 2 h k a^* b^* U^{12} ]$

| Atom  | U <sup>11</sup> | U <sup>22</sup> | U <sup>33</sup> | U <sup>23</sup> | U <sup>13</sup> | U <sup>12</sup> |
|-------|-----------------|-----------------|-----------------|-----------------|-----------------|-----------------|
| Pb(1) | 14(1)           | 19(1)           | 11(1)           | 0(1)            | 1(1)            | 0(1)            |
| S(1)  | 19(1)           | 19(1)           | 16(1)           | -3(1)           | -1(1)           | 1(1)            |
| S(2)  | 20(1)           | 17(1)           | 19(1)           | 2(1)            | 0(1)            | 2(1)            |
| N(1)  | 15(1)           | 21(1)           | 13(1)           | 2(1)            | 2(1)            | 2(1)            |
| N(2)  | 17(1)           | 15(1)           | 17(1)           | -1(1)           | 2(1)            | -3(1)           |
| C(1)  | 21(2)           | 22(2)           | 18(2)           | -3(1)           | -6(1)           | 1(1)            |
| C(2)  | 18(2)           | 21(2)           | 18(2)           | 0(1)            | -6(1)           | 4(1)            |
| C(3)  | 16(2)           | 27(2)           | 27(2)           | 8(1)            | 0(1)            | 3(1)            |
| C(4)  | 18(2)           | 23(1)           | 20(2)           | -1(1)           | 1(1)            | 5(1)            |
| C(5)  | 23(2)           | 21(2)           | 20(2)           | 3(1)            | 3(1)            | -2(1)           |
| C(6)  | 15(2)           | 21(2)           | 18(2)           | 2(1)            | 3(1)            | -4(1)           |
| C(7)  | 20(2)           | 19(2)           | 19(1)           | -3(1)           | -6(1)           | -2(1)           |
| C(8)  | 20(2)           | 22(2)           | 19(2)           | -6(1)           | 1(1)            | 2(1)            |

**Table S5.** Hydrogen coordinates ( $\times 10^4$ ) and isotropic displacement parameters ( $\text{\AA}^2 \times 10^3$ ) for **4<sub>LT</sub>**.

| Atom  | x    | y    | z    | U(iso) |
|-------|------|------|------|--------|
| H(1A) | 1949 | 3345 | 4623 | 24     |
| H(1B) | 1732 | 2838 | 5917 | 24     |
| H(2A) | 1862 | 5408 | 5314 | 23     |
| H(2B) | 559  | 4680 | 5600 | 23     |
| H(3A) | 76   | 4064 | 7596 | 35     |
| H(3B) | 1074 | 4390 | 8614 | 35     |
| H(3C) | 1399 | 3312 | 7700 | 35     |
| H(4A) | 204  | 6333 | 6938 | 30     |
| H(4B) | 1615 | 6926 | 6906 | 30     |
| H(4C) | 1035 | 6423 | 8110 | 30     |
| H(5A) | 5692 | 5939 | 4996 | 25     |
| H(5B) | 6046 | 7383 | 5065 | 25     |
| H(6A) | 7628 | 6355 | 6052 | 22     |
| H(6B) | 6785 | 7057 | 7015 | 22     |
| H(7A) | 8102 | 5312 | 8085 | 29     |
| H(7B) | 7021 | 4392 | 8575 | 29     |
| H(7C) | 6820 | 5861 | 8659 | 29     |
| H(8A) | 7943 | 4184 | 6236 | 31     |
| H(8B) | 6594 | 4151 | 5564 | 31     |
| H(8C) | 6792 | 3346 | 6724 | 31     |

**Table S6.** Torsion angles [°] for **4\_LT**.

---

|                      |             |                      |            |
|----------------------|-------------|----------------------|------------|
| N(2)-Pb(1)-S(1)-C(1) | -162.76(13) | S(2)-Pb(1)-N(2)-C(7) | 125.4(2)   |
| N(1)-Pb(1)-S(1)-C(1) | -2.48(13)   | N(1)-Pb(1)-N(2)-C(8) | -76.2(3)   |
| S(2)-Pb(1)-S(1)-C(1) | -85.49(11)  | S(1)-Pb(1)-N(2)-C(8) | -21.1(2)   |
| N(2)-Pb(1)-S(2)-C(5) | 20.06(12)   | S(2)-Pb(1)-N(2)-C(8) | -115.1(2)  |
| N(1)-Pb(1)-S(2)-C(5) | -145.26(12) | N(1)-Pb(1)-N(2)-C(6) | 45.9(3)    |
| S(1)-Pb(1)-S(2)-C(5) | -68.58(11)  | S(1)-Pb(1)-N(2)-C(6) | 100.98(18) |
| N(2)-Pb(1)-N(1)-C(2) | 32.2(3)     | S(2)-Pb(1)-N(2)-C(6) | 7.04(18)   |
| S(1)-Pb(1)-N(1)-C(2) | -25.04(19)  | Pb(1)-S(1)-C(1)-C(2) | 31.0(2)    |
| S(2)-Pb(1)-N(1)-C(2) | 70.2(2)     | C(4)-N(1)-C(2)-C(1)  | 175.4(3)   |
| N(2)-Pb(1)-N(1)-C(4) | -88.6(3)    | C(3)-N(1)-C(2)-C(1)  | -63.3(3)   |
| S(1)-Pb(1)-N(1)-C(4) | -145.82(19) | Pb(1)-N(1)-C(2)-C(1) | 53.6(3)    |
| S(2)-Pb(1)-N(1)-C(4) | -50.60(18)  | S(1)-C(1)-C(2)-N(1)  | -61.4(3)   |
| N(2)-Pb(1)-N(1)-C(3) | 152.4(2)    | Pb(1)-S(2)-C(5)-C(6) | -51.8(2)   |
| S(1)-Pb(1)-N(1)-C(3) | 95.18(19)   | C(7)-N(2)-C(6)-C(5)  | -156.3(3)  |
| S(2)-Pb(1)-N(1)-C(3) | -169.60(19) | C(8)-N(2)-C(6)-C(5)  | 80.5(3)    |
| N(1)-Pb(1)-N(2)-C(7) | 164.2(2)    | Pb(1)-N(2)-C(6)-C(5) | -41.3(3)   |
| S(1)-Pb(1)-N(2)-C(7) | -140.7(2)   | S(2)-C(5)-C(6)-N(2)  | 68.4(3)    |

---



**Table S7.** Crystal data and structure refinement for **4\_RT**.

|                                                 |                                                                     |          |
|-------------------------------------------------|---------------------------------------------------------------------|----------|
| Identification code                             | <b>Pb(SCH<sub>2</sub>CH<sub>2</sub>NMe<sub>2</sub>)<sub>2</sub></b> |          |
| Empirical formula                               | C <sub>8</sub> H <sub>20</sub> N <sub>2</sub> Pb S <sub>2</sub>     |          |
| Formula weight                                  | 415.57                                                              |          |
| Temperature                                     | 290(2) K                                                            |          |
| Wavelength                                      | 0.71073 Å                                                           |          |
| Crystal system                                  | Orthorhombic                                                        |          |
| Space group                                     | <i>P</i> 2 <sub>1</sub> 2 <sub>1</sub> 2 <sub>1</sub>               |          |
| Unit cell dimensions                            | a = 10.4854(8) Å                                                    | α = 90°. |
|                                                 | b = 11.0707(8) Å                                                    | β = 90°. |
|                                                 | c = 11.5937(8) Å                                                    | γ = 90°. |
| Volume                                          | 1345.80(17) Å <sup>3</sup>                                          |          |
| Z                                               | 4                                                                   |          |
| Density (calculated)                            | 2.051 Mg/m <sup>3</sup>                                             |          |
| Absorption coefficient                          | 12.812 mm <sup>-1</sup>                                             |          |
| F(000)                                          | 784                                                                 |          |
| Crystal size                                    | 0.15 x 0.12 x 0.10 mm <sup>3</sup>                                  |          |
| Theta range for data collection                 | 2.68 to 30.55°.                                                     |          |
| Index ranges                                    | -14 ≤ h ≤ 15, -15 ≤ k ≤ 15, -16 ≤ l ≤ 16                            |          |
| Reflections collected                           | 17566                                                               |          |
| Independent reflections                         | 4077 [R(int) = 0.0384]                                              |          |
| Completeness to theta = 30.55°                  | 98.5 %                                                              |          |
| Absorption correction                           | Semi-empirical from equivalents                                     |          |
| Max. and min. transmission                      | 0.361 and 0.250                                                     |          |
| Refinement method                               | Full-matrix least-squares on F <sup>2</sup>                         |          |
| Data / restraints / parameters                  | 4077 / 21 / 118                                                     |          |
| Goodness-of-fit on F <sup>2</sup>               | 1.006                                                               |          |
| Final R indices [for 2828 rflns with I > 2σ(I)] | R1 = 0.0297, wR2 = 0.0545                                           |          |
| R indices (all data)                            | R1 = 0.0582, wR2 = 0.0613                                           |          |
| Absolute structure parameter                    | 0.007(9)                                                            |          |
| Largest diff. peak and hole                     | 0.775 and -1.166 e.Å <sup>-3</sup>                                  |          |

**Table S8.** Atomic coordinates ( $\times 10^4$ ) and equivalent isotropic displacement parameters ( $\text{\AA}^2 \times 10^3$ ) for **4\_RT**.  $U(\text{eq})$  is defined as one third of the trace of the orthogonalized  $U_{ij}$  tensor.

| Atom  | x         | y        | z        | $U(\text{eq})$ |
|-------|-----------|----------|----------|----------------|
| Pb(1) | 9055(1)   | 4970(1)  | 7379(1)  | 57(1)          |
| S(1)  | 8808(2)   | 3485(1)  | 5638(1)  | 69(1)          |
| S(2)  | 9164(2)   | 6955(1)  | 6135(2)  | 75(1)          |
| N(1)  | 6584(4)   | 5016(4)  | 6981(3)  | 65(1)          |
| N(2)  | 11499(3)  | 5177(3)  | 6933(3)  | 62(1)          |
| C(1)  | 7093(3)   | 3550(5)  | 5422(6)  | 84(1)          |
| C(2)  | 6419(7)   | 4718(5)  | 5755(4)  | 84(1)          |
| C(3)  | 6017(6)   | 4159(6)  | 7807(6)  | 84(2)          |
| C(4)  | 6023(6)   | 6215(5)  | 7197(6)  | 78(2)          |
| C(5)  | 10732(4)  | 6649(8)  | 5525(5)  | 71(2)          |
| C(6)  | 11755(7)  | 6375(4)  | 6421(5)  | 71(2)          |
| C(5') | 10874(4)  | 7222(12) | 6095(18) | 71(2)          |
| C(6') | 11614(17) | 6046(9)  | 5972(8)  | 71(2)          |
| C(7)  | 12069(8)  | 5114(6)  | 8101(4)  | 68(2)          |
| C(8)  | 12022(10) | 4210(5)  | 6197(6)  | 68(2)          |
| C(7') | 12318(19) | 5539(16) | 7906(12) | 68(2)          |
| C(8') | 11850(20) | 3951(6)  | 6532(12) | 68(2)          |

**Table S9.** Bond lengths [Å] and angles [°] for **4\_RT**.

|                  |            |                  |          |
|------------------|------------|------------------|----------|
| Pb(1)-S(1)       | 2.6164(14) | C(4)-H(4B)       | 0.9600   |
| Pb(1)-N(2)       | 2.624(3)   | C(4)-H(4C)       | 0.9600   |
| Pb(1)-S(2)       | 2.6311(16) | C(5)-C(6)        | 1.523(8) |
| Pb(1)-N(1)       | 2.632(4)   | C(5)-H(5A)       | 0.9700   |
| S(1)-C(1)        | 1.817(3)   | C(5)-H(5B)       | 0.9700   |
| S(2)-C(5')       | 1.818(5)   | C(6)-H(6A)       | 0.9700   |
| S(2)-C(5)        | 1.821(5)   | C(6)-H(6B)       | 0.9700   |
| N(1)-C(2)        | 1.469(7)   | C(5')-C(6')      | 1.522(8) |
| N(1)-C(4)        | 1.473(7)   | C(5')-H(5C)      | 0.9700   |
| N(1)-C(3)        | 1.474(8)   | C(5')-H(5D)      | 0.9700   |
| N(2)-C(7')       | 1.473(8)   | C(6')-H(6C)      | 0.9700   |
| N(2)-C(8)        | 1.474(7)   | C(6')-H(6D)      | 0.9700   |
| N(2)-C(6)        | 1.477(7)   | C(7)-H(7A)       | 0.9600   |
| N(2)-C(6')       | 1.477(8)   | C(7)-H(7B)       | 0.9600   |
| N(2)-C(8')       | 1.480(8)   | C(7)-H(7C)       | 0.9600   |
| N(2)-C(7)        | 1.481(7)   | C(8)-H(8A)       | 0.9600   |
| C(1)-C(2)        | 1.523(8)   | C(8)-H(8B)       | 0.9600   |
| C(1)-H(1A)       | 0.9700     | C(8)-H(8C)       | 0.9600   |
| C(1)-H(1B)       | 0.9700     | C(7')-H(7D)      | 0.9600   |
| C(2)-H(2A)       | 0.9700     | C(7')-H(7E)      | 0.9600   |
| C(2)-H(2B)       | 0.9700     | C(7')-H(7F)      | 0.9600   |
| C(3)-H(3A)       | 0.9600     | C(8')-H(8D)      | 0.9600   |
| C(3)-H(3B)       | 0.9600     | C(8')-H(8E)      | 0.9600   |
| C(3)-H(3C)       | 0.9600     | C(8')-H(8F)      | 0.9600   |
| C(4)-H(4A)       | 0.9600     |                  |          |
| S(1)-Pb(1)-N(2)  | 89.97(9)   | C(4)-N(1)-C(3)   | 108.0(5) |
| S(1)-Pb(1)-S(2)  | 96.08(5)   | C(2)-N(1)-Pb(1)  | 106.4(3) |
| N(2)-Pb(1)-S(2)  | 77.09(8)   | C(4)-N(1)-Pb(1)  | 112.4(4) |
| S(1)-Pb(1)-N(1)  | 77.26(10)  | C(3)-N(1)-Pb(1)  | 105.7(3) |
| N(2)-Pb(1)-N(1)  | 157.66(11) | C(8)-N(2)-C(6)   | 110.6(3) |
| S(2)-Pb(1)-N(1)  | 86.01(11)  | C(7')-N(2)-C(6') | 110.7(3) |
| C(1)-S(1)-Pb(1)  | 100.33(19) | C(7')-N(2)-C(8') | 110.3(3) |
| C(5')-S(2)-Pb(1) | 101.1(5)   | C(6')-N(2)-C(8') | 109.9(3) |
| C(5)-S(2)-Pb(1)  | 95.5(2)    | C(8)-N(2)-C(7)   | 110.2(3) |
| C(2)-N(1)-C(4)   | 108.6(4)   | C(6)-N(2)-C(7)   | 109.7(3) |
| C(2)-N(1)-C(3)   | 115.9(5)   | C(7')-N(2)-Pb(1) | 116.2(9) |

|                  |          |                   |           |
|------------------|----------|-------------------|-----------|
| C(8)-N(2)-Pb(1)  | 114.4(4) | N(2)-C(6)-H(6A)   | 109.9     |
| C(6)-N(2)-Pb(1)  | 109.6(3) | C(5)-C(6)-H(6A)   | 109.9     |
| C(6')-N(2)-Pb(1) | 106.6(7) | N(2)-C(6)-H(6B)   | 109.9     |
| C(8')-N(2)-Pb(1) | 102.8(9) | C(5)-C(6)-H(6B)   | 109.9     |
| C(7)-N(2)-Pb(1)  | 102.1(4) | H(6A)-C(6)-H(6B)  | 108.3     |
| C(2)-C(1)-S(1)   | 117.2(4) | C(6')-C(5')-S(2)  | 111.5(10) |
| C(2)-C(1)-H(1A)  | 108.0    | C(6')-C(5')-H(5C) | 109.3     |
| S(1)-C(1)-H(1A)  | 108.0    | S(2)-C(5')-H(5C)  | 109.3     |
| C(2)-C(1)-H(1B)  | 108.0    | C(6')-C(5')-H(5D) | 109.3     |
| S(1)-C(1)-H(1B)  | 108.0    | S(2)-C(5')-H(5D)  | 109.3     |
| H(1A)-C(1)-H(1B) | 107.2    | H(5C)-C(5')-H(5D) | 108.0     |
| N(1)-C(2)-C(1)   | 112.4(4) | N(2)-C(6')-C(5')  | 116.4(11) |
| N(1)-C(2)-H(2A)  | 109.1    | N(2)-C(6')-H(6C)  | 108.2     |
| C(1)-C(2)-H(2A)  | 109.1    | C(5')-C(6')-H(6C) | 108.2     |
| N(1)-C(2)-H(2B)  | 109.1    | N(2)-C(6')-H(6D)  | 108.2     |
| C(1)-C(2)-H(2B)  | 109.1    | C(5')-C(6')-H(6D) | 108.2     |
| H(2A)-C(2)-H(2B) | 107.9    | H(6C)-C(6')-H(6D) | 107.3     |
| N(1)-C(3)-H(3A)  | 109.5    | N(2)-C(7)-H(7A)   | 109.5     |
| N(1)-C(3)-H(3B)  | 109.5    | N(2)-C(7)-H(7B)   | 109.5     |
| H(3A)-C(3)-H(3B) | 109.5    | N(2)-C(7)-H(7C)   | 109.5     |
| N(1)-C(3)-H(3C)  | 109.5    | N(2)-C(8)-H(8A)   | 109.5     |
| H(3A)-C(3)-H(3C) | 109.5    | N(2)-C(8)-H(8B)   | 109.5     |
| H(3B)-C(3)-H(3C) | 109.5    | N(2)-C(8)-H(8C)   | 109.5     |
| N(1)-C(4)-H(4A)  | 109.5    | N(2)-C(7')-H(7D)  | 109.5     |
| N(1)-C(4)-H(4B)  | 109.5    | N(2)-C(7')-H(7E)  | 109.5     |
| H(4A)-C(4)-H(4B) | 109.5    | H(7D)-C(7')-H(7E) | 109.5     |
| N(1)-C(4)-H(4C)  | 109.5    | N(2)-C(7')-H(7F)  | 109.5     |
| H(4A)-C(4)-H(4C) | 109.5    | H(7D)-C(7')-H(7F) | 109.5     |
| H(4B)-C(4)-H(4C) | 109.5    | H(7E)-C(7')-H(7F) | 109.5     |
| C(6)-C(5)-S(2)   | 114.1(5) | N(2)-C(8')-H(8D)  | 109.5     |
| C(6)-C(5)-H(5A)  | 108.7    | N(2)-C(8')-H(8E)  | 109.5     |
| S(2)-C(5)-H(5A)  | 108.7    | H(8D)-C(8')-H(8E) | 109.5     |
| C(6)-C(5)-H(5B)  | 108.7    | N(2)-C(8')-H(8F)  | 109.5     |
| S(2)-C(5)-H(5B)  | 108.7    | H(8D)-C(8')-H(8F) | 109.5     |
| H(5A)-C(5)-H(5B) | 107.6    | H(8E)-C(8')-H(8F) | 109.5     |
| N(2)-C(6)-C(5)   | 109.0(5) |                   |           |

**Table S10.** Anisotropic displacement parameters ( $\text{\AA}^2 \times 10^3$ ) for **4\_RT**. The anisotropic displacement factor exponent takes the form:  $-2\pi^2[ h^2 a^{*2}U^{11} + \dots + 2 h k a^* b^* U^{12} ]$

| Atom  | U <sup>11</sup> | U <sup>22</sup> | U <sup>33</sup> | U <sup>23</sup> | U <sup>13</sup> | U <sup>12</sup> |
|-------|-----------------|-----------------|-----------------|-----------------|-----------------|-----------------|
| Pb(1) | 53(1)           | 78(1)           | 41(1)           | 1(1)            | 2(1)            | 2(1)            |
| S(1)  | 83(1)           | 64(1)           | 59(1)           | -5(1)           | 0(1)            | 5(1)            |
| S(2)  | 81(1)           | 58(1)           | 85(1)           | 2(1)            | -6(1)           | 12(1)           |
| N(1)  | 54(2)           | 91(3)           | 51(2)           | 11(4)           | 0(2)            | 6(3)            |
| N(2)  | 56(2)           | 47(3)           | 82(3)           | 9(2)            | 14(2)           | 4(2)            |
| C(1)  | 98(4)           | 76(3)           | 79(3)           | -6(2)           | -27(3)          | 4(3)            |
| C(2)  | 98(4)           | 76(3)           | 79(3)           | -6(2)           | -27(3)          | 4(3)            |
| C(3)  | 65(4)           | 103(5)          | 85(5)           | 27(4)           | 10(4)           | 9(4)            |
| C(4)  | 72(4)           | 80(4)           | 83(4)           | 12(3)           | 1(4)            | 18(3)           |
| C(5)  | 78(4)           | 65(4)           | 70(4)           | 13(3)           | 5(3)            | -18(3)          |
| C(6)  | 78(4)           | 65(4)           | 70(4)           | 13(3)           | 5(3)            | -18(3)          |
| C(5') | 78(4)           | 65(4)           | 70(4)           | 13(3)           | 5(3)            | -18(3)          |
| C(6') | 78(4)           | 65(4)           | 70(4)           | 13(3)           | 5(3)            | -18(3)          |
| C(7)  | 56(4)           | 68(3)           | 82(3)           | 0(3)            | 11(3)           | -9(3)           |
| C(8)  | 56(4)           | 68(3)           | 82(3)           | 0(3)            | 11(3)           | -9(3)           |
| C(7') | 56(4)           | 68(3)           | 82(3)           | 0(3)            | 11(3)           | -9(3)           |
| C(8') | 56(4)           | 68(3)           | 82(3)           | 0(3)            | 11(3)           | -9(3)           |

**Table S11.** Hydrogen coordinates ( $\times 10^4$ ) and isotropic displacement parameters ( $\text{\AA}^2 \times 10^3$ ) for **4\_RT**.

| Atom  | x     | y    | z    | U(iso) |
|-------|-------|------|------|--------|
| H(1A) | 6922  | 3395 | 4613 | 101    |
| H(1B) | 6710  | 2896 | 5859 | 101    |
| H(2A) | 6752  | 5374 | 5290 | 101    |
| H(2B) | 5516  | 4641 | 5589 | 101    |
| H(3A) | 5155  | 3986 | 7585 | 126    |
| H(3B) | 6025  | 4507 | 8566 | 126    |
| H(3C) | 6504  | 3424 | 7810 | 126    |
| H(4A) | 5133  | 6200 | 7003 | 117    |
| H(4B) | 6450  | 6807 | 6731 | 117    |
| H(4C) | 6120  | 6419 | 7997 | 117    |
| H(5A) | 10664 | 5967 | 5004 | 85     |
| H(5B) | 10998 | 7343 | 5076 | 85     |
| H(6A) | 12589 | 6377 | 6059 | 85     |
| H(6B) | 11747 | 6989 | 7018 | 85     |
| H(5C) | 11074 | 7749 | 5451 | 85     |
| H(5D) | 11134 | 7628 | 6799 | 85     |
| H(6C) | 11334 | 5649 | 5271 | 85     |
| H(6D) | 12509 | 6243 | 5876 | 85     |
| H(7A) | 12982 | 5120 | 8039 | 102    |
| H(7B) | 11799 | 4382 | 8474 | 102    |
| H(7C) | 11794 | 5796 | 8546 | 102    |
| H(8A) | 12930 | 4301 | 6139 | 102    |
| H(8B) | 11650 | 4262 | 5442 | 102    |
| H(8C) | 11826 | 3439 | 6531 | 102    |
| H(7D) | 12950 | 6101 | 7641 | 102    |
| H(7E) | 12731 | 4839 | 8220 | 102    |
| H(7F) | 11806 | 5914 | 8492 | 102    |
| H(8D) | 12757 | 3875 | 6508 | 102    |
| H(8E) | 11502 | 3821 | 5774 | 102    |
| H(8F) | 11501 | 3362 | 7053 | 102    |

**Table S12.** Torsion angles [°] for **4\_RT**.

|                       |           |                        |           |
|-----------------------|-----------|------------------------|-----------|
| N(2)-Pb(1)-S(1)-C(1)  | -162.1(2) | N(1)-Pb(1)-N(2)-C(6)   | 52.3(4)   |
| S(2)-Pb(1)-S(1)-C(1)  | -85.1(2)  | S(1)-Pb(1)-N(2)-C(6')  | 80.1(6)   |
| N(1)-Pb(1)-S(1)-C(1)  | -0.6(2)   | S(2)-Pb(1)-N(2)-C(6')  | -16.1(6)  |
| S(1)-Pb(1)-S(2)-C(5') | -99.4(6)  | N(1)-Pb(1)-N(2)-C(6')  | 25.6(7)   |
| N(2)-Pb(1)-S(2)-C(5') | -10.9(6)  | S(1)-Pb(1)-N(2)-C(8')  | -35.4(6)  |
| N(1)-Pb(1)-S(2)-C(5') | -176.2(6) | S(2)-Pb(1)-N(2)-C(8')  | -131.7(6) |
| S(1)-Pb(1)-S(2)-C(5)  | -70.1(3)  | N(1)-Pb(1)-N(2)-C(8')  | -89.9(7)  |
| N(2)-Pb(1)-S(2)-C(5)  | 18.5(3)   | S(1)-Pb(1)-N(2)-C(7)   | -137.0(3) |
| N(1)-Pb(1)-S(2)-C(5)  | -146.8(3) | S(2)-Pb(1)-N(2)-C(7)   | 126.7(3)  |
| S(1)-Pb(1)-N(1)-C(2)  | -26.6(3)  | N(1)-Pb(1)-N(2)-C(7)   | 168.5(4)  |
| N(2)-Pb(1)-N(1)-C(2)  | 30.0(6)   | Pb(1)-S(1)-C(1)-C(2)   | 29.0(5)   |
| S(2)-Pb(1)-N(1)-C(2)  | 70.6(3)   | C(4)-N(1)-C(2)-C(1)    | 174.0(5)  |
| S(1)-Pb(1)-N(1)-C(4)  | -145.3(3) | C(3)-N(1)-C(2)-C(1)    | -64.3(7)  |
| N(2)-Pb(1)-N(1)-C(4)  | -88.7(4)  | Pb(1)-N(1)-C(2)-C(1)   | 52.8(6)   |
| S(2)-Pb(1)-N(1)-C(4)  | -48.1(3)  | S(1)-C(1)-C(2)-N(1)    | -59.6(7)  |
| S(1)-Pb(1)-N(1)-C(3)  | 97.1(4)   | Pb(1)-S(2)-C(5)-C(6)   | -52.8(5)  |
| N(2)-Pb(1)-N(1)-C(3)  | 153.7(4)  | C(8)-N(2)-C(6)-C(5)    | 83.4(7)   |
| S(2)-Pb(1)-N(1)-C(3)  | -165.7(4) | C(7)-N(2)-C(6)-C(5)    | -154.9(5) |
| S(1)-Pb(1)-N(2)-C(7') | -156.0(8) | Pb(1)-N(2)-C(6)-C(5)   | -43.6(5)  |
| S(2)-Pb(1)-N(2)-C(7') | 107.7(8)  | S(2)-C(5)-C(6)-N(2)    | 70.7(7)   |
| N(1)-Pb(1)-N(2)-C(7') | 149.5(8)  | Pb(1)-S(2)-C(5')-C(6') | 38.8(13)  |
| S(1)-Pb(1)-N(2)-C(8)  | -18.1(3)  | C(7')-N(2)-C(6')-C(5') | -78.7(15) |
| S(2)-Pb(1)-N(2)-C(8)  | -114.3(3) | C(8')-N(2)-C(6')-C(5') | 159.2(15) |
| N(1)-Pb(1)-N(2)-C(8)  | -72.5(4)  | Pb(1)-N(2)-C(6')-C(5') | 48.5(13)  |
| S(1)-Pb(1)-N(2)-C(6)  | 106.7(3)  | S(2)-C(5')-C(6')-N(2)  | -63.8(17) |
| S(2)-Pb(1)-N(2)-C(6)  | 10.5(3)   |                        |           |

**Table S13.** Crystal data and structure refinement for **4-HT**

|                                                 |                                                                     |          |
|-------------------------------------------------|---------------------------------------------------------------------|----------|
| CSD deposition number                           | <b>CCDC 780360</b>                                                  |          |
| Identification code                             | <b>Pb(SCH<sub>2</sub>CH<sub>2</sub>NMe<sub>2</sub>)<sub>2</sub></b> |          |
| Empirical formula                               | C <sub>8</sub> H <sub>20</sub> N <sub>2</sub> Pb S <sub>2</sub>     |          |
| Formula weight                                  | 415.57                                                              |          |
| Temperature                                     | 333(2) K                                                            |          |
| Wavelength                                      | 0.71073 Å                                                           |          |
| Crystal system                                  | Orthorhombic                                                        |          |
| Space group                                     | P2 <sub>1</sub> 2 <sub>1</sub> 2 <sub>1</sub>                       |          |
| Unit cell dimensions                            | a = 10.541(11) Å                                                    | a = 90°. |
|                                                 | b = 11.148(12) Å                                                    | b = 90°. |
|                                                 | c = 11.645(12) Å                                                    | g = 90°. |
| Volume                                          | 1368(2) Å <sup>3</sup>                                              |          |
| Z                                               | 4                                                                   |          |
| Density (calculated)                            | 2.018 Mg/m <sup>3</sup>                                             |          |
| Absorption coefficient                          | 12.605 mm <sup>-1</sup>                                             |          |
| F(000)                                          | 784                                                                 |          |
| Crystal size                                    | 0.15 x 0.12 x 0.10 mm <sup>3</sup>                                  |          |
| Theta range for data collection                 | 2.61 to 30.71°.                                                     |          |
| Index ranges                                    | -15 ≤ h ≤ 14, -15 ≤ k ≤ 15, -16 ≤ l ≤ 16                            |          |
| Reflections collected                           | 17933                                                               |          |
| Independent reflections                         | 4204 [R(int) = 0.0361]                                              |          |
| Completeness to theta = 30.71°                  | 98.9 %                                                              |          |
| Absorption correction                           | Integration                                                         |          |
| Max. and min. transmission                      | 0.383 and 0.264                                                     |          |
| Refinement method                               | Full-matrix least-squares on F <sup>2</sup>                         |          |
| Data / restraints / parameters                  | 4204 / 21 / 124                                                     |          |
| Goodness-of-fit on F <sup>2</sup>               | 1.005                                                               |          |
| Final R indices [for 2346 rflns with I > 2σ(I)] | R1 = 0.0452, wR2 = 0.1011                                           |          |
| R indices (all data)                            | R1 = 0.0862, wR2 = 0.1192                                           |          |
| Absolute structure parameter                    | 0.066(16)                                                           |          |
| Largest diff. peak and hole                     | 0.909 and -1.188 e.Å <sup>-3</sup>                                  |          |



**Table S14.** Atomic coordinates ( $\times 10^4$ ) and equivalent isotropic displacement parameters ( $\text{\AA}^2 \times 10^3$ ) for **4-HT**.  $U(\text{eq})$  is defined as one third of the trace of the orthogonalized  $U^{\text{ij}}$  tensor.

| Atom  | x         | y        | z        | $U(\text{eq})$ |
|-------|-----------|----------|----------|----------------|
| Pb(1) | 9031(1)   | 4967(1)  | 7344(1)  | 89(1)          |
| S(1)  | 8786(3)   | 3494(2)  | 5618(3)  | 105(1)         |
| S(2)  | 9145(3)   | 6943(2)  | 6126(3)  | 116(1)         |
| N(1)  | 6555(6)   | 4996(8)  | 6956(5)  | 101(2)         |
| N(2)  | 11474(5)  | 5169(6)  | 6890(5)  | 94(2)          |
| C(1)  | 7089(5)   | 3579(9)  | 5406(13) | 136(4)         |
| C(2)  | 6397(10)  | 4731(9)  | 5729(6)  | 118(4)         |
| C(3)  | 5987(11)  | 4178(11) | 7803(11) | 121(4)         |
| C(4)  | 5992(11)  | 6179(9)  | 7179(11) | 118(4)         |
| C(5)  | 10701(7)  | 6674(17) | 5524(12) | 110(4)         |
| C(6)  | 11701(15) | 6378(7)  | 6427(10) | 110(4)         |
| C(5') | 10837(5)  | 7212(17) | 6150(30) | 110(4)         |
| C(6') | 11590(20) | 6063(13) | 5968(12) | 110(4)         |
| C(7)  | 11999(18) | 5057(12) | 8055(8)  | 101(3)         |
| C(8)  | 11990(20) | 4244(10) | 6124(11) | 101(3)         |
| C(7') | 12170(30) | 5540(20) | 7923(15) | 101(3)         |
| C(8') | 11890(30) | 3980(10) | 6495(17) | 101(3)         |

**Table S15.** Bond lengths [Å] and angles [°] for **4-HT**.

|                  |           |                  |           |
|------------------|-----------|------------------|-----------|
| Pb(1)-S(1)       | 2.608(3)  | C(4)-H(4B)       | 0.9600    |
| Pb(1)-S(2)       | 2.623(4)  | C(4)-H(4C)       | 0.9600    |
| Pb(1)-N(2)       | 2.638(6)  | C(5)-C(6)        | 1.524(12) |
| Pb(1)-N(1)       | 2.649(7)  | C(5)-H(5A)       | 0.9700    |
| S(1)-C(1)        | 1.809(8)  | C(5)-H(5B)       | 0.9700    |
| S(2)-C(5')       | 1.809(9)  | C(6)-H(6A)       | 0.9700    |
| S(2)-C(5)        | 1.809(11) | C(6)-H(6B)       | 0.9700    |
| N(1)-C(2)        | 1.468(12) | C(5')-C(6')      | 1.524(12) |
| N(1)-C(4)        | 1.470(13) | C(5')-H(5C)      | 0.9700    |
| N(1)-C(3)        | 1.471(12) | C(5')-H(5D)      | 0.9700    |
| N(2)-C(7')       | 1.468(14) | C(6')-H(6C)      | 0.9700    |
| N(2)-C(6')       | 1.469(13) | C(6')-H(6D)      | 0.9700    |
| N(2)-C(8)        | 1.470(11) | C(7)-H(7A)       | 0.9600    |
| N(2)-C(7)        | 1.471(12) | C(7)-H(7B)       | 0.9600    |
| N(2)-C(6)        | 1.471(11) | C(7)-H(7C)       | 0.9600    |
| N(2)-C(8')       | 1.472(13) | C(8)-H(8A)       | 0.9600    |
| C(1)-C(2)        | 1.524(10) | C(8)-H(8B)       | 0.9600    |
| C(1)-H(1A)       | 0.9700    | C(8)-H(8C)       | 0.9600    |
| C(1)-H(1B)       | 0.9700    | C(7')-H(7D)      | 0.9600    |
| C(2)-H(2A)       | 0.9700    | C(7')-H(7E)      | 0.9600    |
| C(2)-H(2B)       | 0.9700    | C(7')-H(7F)      | 0.9600    |
| C(3)-H(3A)       | 0.9600    | C(8')-H(8D)      | 0.9600    |
| C(3)-H(3B)       | 0.9600    | C(8')-H(8E)      | 0.9600    |
| C(3)-H(3C)       | 0.9600    | C(8')-H(8F)      | 0.9600    |
| C(4)-H(4A)       | 0.9600    |                  |           |
| S(1)-Pb(1)-S(2)  | 96.71(13) | C(4)-N(1)-C(3)   | 105.9(9)  |
| S(1)-Pb(1)-N(2)  | 89.76(17) | C(2)-N(1)-Pb(1)  | 106.0(5)  |
| S(2)-Pb(1)-N(2)  | 77.00(15) | C(4)-N(1)-Pb(1)  | 112.2(6)  |
| S(1)-Pb(1)-N(1)  | 77.22(18) | C(3)-N(1)-Pb(1)  | 106.2(6)  |
| S(2)-Pb(1)-N(1)  | 86.71(19) | C(7')-N(2)-C(6') | 111.3(3)  |
| N(2)-Pb(1)-N(1)  | 157.9(2)  | C(7')-N(2)-C(8)  | 120.7(19) |
| C(1)-S(1)-Pb(1)  | 99.8(4)   | C(6')-N(2)-C(8)  | 90.0(9)   |
| C(5')-S(2)-Pb(1) | 100.1(8)  | C(6')-N(2)-C(7)  | 134.3(10) |
| C(5)-S(2)-Pb(1)  | 96.4(5)   | C(8)-N(2)-C(7)   | 111.1(3)  |
| C(2)-N(1)-C(4)   | 107.8(8)  | C(7')-N(2)-C(6)  | 87.7(9)   |
| C(2)-N(1)-C(3)   | 118.8(10) | C(8)-N(2)-C(6)   | 111.1(3)  |

|                  |           |                   |           |
|------------------|-----------|-------------------|-----------|
| C(7)-N(2)-C(6)   | 110.8(3)  | S(2)-C(5)-H(5B)   | 108.9     |
| C(7')-N(2)-C(8') | 111.2(3)  | H(5A)-C(5)-H(5B)  | 107.7     |
| C(6')-N(2)-C(8') | 110.9(3)  | N(2)-C(6)-C(5)    | 109.7(10) |
| C(7)-N(2)-C(8')  | 95.6(13)  | N(2)-C(6)-H(6A)   | 109.7     |
| C(6)-N(2)-C(8')  | 131.5(11) | C(5)-C(6)-H(6A)   | 109.7     |
| C(7')-N(2)-Pb(1) | 110.2(13) | N(2)-C(6)-H(6B)   | 109.7     |
| C(6')-N(2)-Pb(1) | 106.8(10) | C(5)-C(6)-H(6B)   | 109.7     |
| C(8)-N(2)-Pb(1)  | 115.2(10) | H(6A)-C(6)-H(6B)  | 108.2     |
| C(7)-N(2)-Pb(1)  | 100.1(8)  | C(6')-C(5')-S(2)  | 112.0(14) |
| C(6)-N(2)-Pb(1)  | 108.1(7)  | C(6')-C(5')-H(5C) | 109.2     |
| C(8')-N(2)-Pb(1) | 106.2(13) | S(2)-C(5')-H(5C)  | 109.2     |
| C(2)-C(1)-S(1)   | 118.9(7)  | C(6')-C(5')-H(5D) | 109.2     |
| C(2)-C(1)-H(1A)  | 107.6     | S(2)-C(5')-H(5D)  | 109.2     |
| S(1)-C(1)-H(1A)  | 107.6     | H(5C)-C(5')-H(5D) | 107.9     |
| C(2)-C(1)-H(1B)  | 107.6     | N(2)-C(6')-C(5')  | 115.1(16) |
| S(1)-C(1)-H(1B)  | 107.6     | N(2)-C(6')-H(6C)  | 108.5     |
| H(1A)-C(1)-H(1B) | 107.0     | C(5')-C(6')-H(6C) | 108.5     |
| N(1)-C(2)-C(1)   | 110.9(9)  | N(2)-C(6')-H(6D)  | 108.5     |
| N(1)-C(2)-H(2A)  | 109.5     | C(5')-C(6')-H(6D) | 108.5     |
| C(1)-C(2)-H(2A)  | 109.5     | H(6C)-C(6')-H(6D) | 107.5     |
| N(1)-C(2)-H(2B)  | 109.5     | N(2)-C(7)-H(7A)   | 109.5     |
| C(1)-C(2)-H(2B)  | 109.5     | N(2)-C(7)-H(7B)   | 109.5     |
| H(2A)-C(2)-H(2B) | 108.1     | N(2)-C(7)-H(7C)   | 109.5     |
| N(1)-C(3)-H(3A)  | 109.5     | N(2)-C(8)-H(8A)   | 109.5     |
| N(1)-C(3)-H(3B)  | 109.5     | N(2)-C(8)-H(8B)   | 109.5     |
| H(3A)-C(3)-H(3B) | 109.5     | N(2)-C(8)-H(8C)   | 109.5     |
| N(1)-C(3)-H(3C)  | 109.5     | N(2)-C(7')-H(7D)  | 109.5     |
| H(3A)-C(3)-H(3C) | 109.5     | N(2)-C(7')-H(7E)  | 109.5     |
| H(3B)-C(3)-H(3C) | 109.5     | H(7D)-C(7')-H(7E) | 109.5     |
| N(1)-C(4)-H(4A)  | 109.5     | N(2)-C(7')-H(7F)  | 109.5     |
| N(1)-C(4)-H(4B)  | 109.5     | H(7D)-C(7')-H(7F) | 109.5     |
| H(4A)-C(4)-H(4B) | 109.5     | H(7E)-C(7')-H(7F) | 109.5     |
| N(1)-C(4)-H(4C)  | 109.5     | N(2)-C(8')-H(8D)  | 109.5     |
| H(4A)-C(4)-H(4C) | 109.5     | N(2)-C(8')-H(8E)  | 109.5     |
| H(4B)-C(4)-H(4C) | 109.5     | H(8D)-C(8')-H(8E) | 109.5     |
| C(6)-C(5)-S(2)   | 113.3(10) | N(2)-C(8')-H(8F)  | 109.5     |
| C(6)-C(5)-H(5A)  | 108.9     | H(8D)-C(8')-H(8F) | 109.5     |
| S(2)-C(5)-H(5A)  | 108.9     | H(8E)-C(8')-H(8F) | 109.5     |
| C(6)-C(5)-H(5B)  | 108.9     |                   |           |



**Table S16.** Anisotropic displacement parameters ( $\text{\AA}^2 \times 10^3$ ) for **4-HT**. The anisotropic displacement factor exponent takes the form:  $-2p^2[ h^2 a^*2U^{11} + \dots + 2 h k a^* b^* U^{12} ]$

| Atom  | U <sup>11</sup> | U <sup>22</sup> | U <sup>33</sup> | U <sup>23</sup> | U <sup>13</sup> | U <sup>12</sup> |
|-------|-----------------|-----------------|-----------------|-----------------|-----------------|-----------------|
| Pb(1) | 88(1)           | 108(1)          | 71(1)           | 0(1)            | 3(1)            | 2(1)            |
| S(1)  | 122(2)          | 93(2)           | 100(2)          | -8(1)           | 0(2)            | 3(2)            |
| S(2)  | 125(2)          | 90(2)           | 134(2)          | 2(2)            | -8(2)           | 16(2)           |
| N(1)  | 83(4)           | 133(6)          | 88(4)           | 23(7)           | -2(3)           | 14(6)           |
| N(2)  | 88(4)           | 79(5)           | 115(5)          | 10(5)           | 12(4)           | 1(4)            |
| C(1)  | 152(10)         | 103(8)          | 152(10)         | 0(7)            | -54(9)          | -17(8)          |
| C(2)  | 112(7)          | 132(10)         | 108(7)          | -4(6)           | -27(5)          | 21(7)           |
| C(3)  | 99(8)           | 147(10)         | 116(9)          | 34(7)           | 14(7)           | -7(7)           |
| C(4)  | 96(7)           | 138(9)          | 119(9)          | 12(7)           | 10(7)           | 28(6)           |
| C(5)  | 118(8)          | 99(8)           | 112(10)         | 12(6)           | 12(7)           | -23(6)          |
| C(6)  | 118(8)          | 99(8)           | 112(10)         | 12(6)           | 12(7)           | -23(6)          |
| C(5') | 118(8)          | 99(8)           | 112(10)         | 12(6)           | 12(7)           | -23(6)          |
| C(6') | 118(8)          | 99(8)           | 112(10)         | 12(6)           | 12(7)           | -23(6)          |
| C(7)  | 100(6)          | 89(7)           | 115(7)          | -9(7)           | 9(6)            | -16(7)          |
| C(8)  | 100(6)          | 89(7)           | 115(7)          | -9(7)           | 9(6)            | -16(7)          |
| C(7') | 100(6)          | 89(7)           | 115(7)          | -9(7)           | 9(6)            | -16(7)          |
| C(8') | 100(6)          | 89(7)           | 115(7)          | -9(7)           | 9(6)            | -16(7)          |

**Table S17.** Hydrogen coordinates ( $\times 10^4$ ) and isotropic displacement parameters ( $\text{\AA}^2 \times 10^3$ ) for **4-HT**.

| Atom  | x     | y    | z    | U(iso) |
|-------|-------|------|------|--------|
| H(1A) | 6922  | 3425 | 4600 | 163    |
| H(1B) | 6705  | 2929 | 5837 | 163    |
| H(2A) | 6729  | 5392 | 5279 | 141    |
| H(2B) | 5502  | 4648 | 5555 | 141    |
| H(3A) | 5104  | 4368 | 7897 | 181    |
| H(3B) | 6414  | 4266 | 8526 | 181    |
| H(3C) | 6070  | 3366 | 7541 | 181    |
| H(4A) | 5109  | 6165 | 6976 | 177    |
| H(4B) | 6421  | 6774 | 6727 | 177    |
| H(4C) | 6078  | 6371 | 7979 | 177    |
| H(5A) | 10647 | 6014 | 4984 | 132    |
| H(5B) | 10968 | 7381 | 5103 | 132    |
| H(6A) | 12539 | 6415 | 6084 | 132    |
| H(6B) | 11665 | 6963 | 7043 | 132    |
| H(5C) | 11053 | 7782 | 5551 | 132    |
| H(5D) | 11069 | 7563 | 6882 | 132    |
| H(6C) | 11323 | 5698 | 5253 | 132    |
| H(6D) | 12483 | 6272 | 5887 | 132    |
| H(7A) | 12900 | 5179 | 8031 | 152    |
| H(7B) | 11820 | 4271 | 8349 | 152    |
| H(7C) | 11618 | 5649 | 8545 | 152    |
| H(8A) | 12856 | 4441 | 5933 | 152    |
| H(8B) | 11497 | 4208 | 5434 | 152    |
| H(8C) | 11970 | 3480 | 6503 | 152    |
| H(7D) | 12423 | 6364 | 7846 | 152    |
| H(7E) | 12904 | 5045 | 8016 | 152    |
| H(7F) | 11627 | 5458 | 8582 | 152    |
| H(8D) | 12740 | 4036 | 6197 | 152    |
| H(8E) | 11334 | 3699 | 5903 | 152    |
| H(8F) | 11880 | 3428 | 7128 | 152    |

**Table S18.** Torsion angles [°] for **4-HT**.

|                       |           |                        |            |
|-----------------------|-----------|------------------------|------------|
| S(2)-Pb(1)-S(1)-C(1)  | -84.5(5)  | S(1)-Pb(1)-N(2)-C(6)   | 109.2(5)   |
| N(2)-Pb(1)-S(1)-C(1)  | -161.4(5) | S(2)-Pb(1)-N(2)-C(6)   | 12.2(5)    |
| N(1)-Pb(1)-S(1)-C(1)  | 0.5(5)    | N(1)-Pb(1)-N(2)-C(6)   | 55.9(8)    |
| S(1)-Pb(1)-S(2)-C(5') | -101.4(9) | S(1)-Pb(1)-N(2)-C(8')  | -36.0(8)   |
| N(2)-Pb(1)-S(2)-C(5') | -13.2(9)  | S(2)-Pb(1)-N(2)-C(8')  | -132.9(8)  |
| N(1)-Pb(1)-S(2)-C(5') | -178.1(9) | N(1)-Pb(1)-N(2)-C(8')  | -89.3(10)  |
| S(1)-Pb(1)-S(2)-C(5)  | -70.7(6)  | Pb(1)-S(1)-C(1)-C(2)   | 28.7(11)   |
| N(2)-Pb(1)-S(2)-C(5)  | 17.5(6)   | C(4)-N(1)-C(2)-C(1)    | 173.7(9)   |
| N(1)-Pb(1)-S(2)-C(5)  | -147.4(6) | C(3)-N(1)-C(2)-C(1)    | -66.0(12)  |
| S(1)-Pb(1)-N(1)-C(2)  | -28.2(6)  | Pb(1)-N(1)-C(2)-C(1)   | 53.3(10)   |
| S(2)-Pb(1)-N(1)-C(2)  | 69.5(7)   | S(1)-C(1)-C(2)-N(1)    | -60.2(14)  |
| N(2)-Pb(1)-N(1)-C(2)  | 27.1(10)  | C(5')-S(2)-C(5)-C(6)   | 47.5(17)   |
| S(1)-Pb(1)-N(1)-C(4)  | -145.6(7) | Pb(1)-S(2)-C(5)-C(6)   | -51.6(11)  |
| S(2)-Pb(1)-N(1)-C(4)  | -48.0(6)  | C(7')-N(2)-C(6)-C(5)   | -156.4(17) |
| N(2)-Pb(1)-N(1)-C(4)  | -90.3(8)  | C(6')-N(2)-C(6)-C(5)   | 45(2)      |
| S(1)-Pb(1)-N(1)-C(3)  | 99.1(8)   | C(8)-N(2)-C(6)-C(5)    | 81.5(12)   |
| S(2)-Pb(1)-N(1)-C(3)  | -163.3(7) | C(7)-N(2)-C(6)-C(5)    | -154.6(11) |
| N(2)-Pb(1)-N(1)-C(3)  | 154.4(8)  | C(8')-N(2)-C(6)-C(5)   | 87(2)      |
| S(1)-Pb(1)-N(2)-C(7') | -156.5(9) | Pb(1)-N(2)-C(6)-C(5)   | -45.8(10)  |
| S(2)-Pb(1)-N(2)-C(7') | 106.6(9)  | S(2)-C(5)-C(6)-N(2)    | 71.7(14)   |
| N(1)-Pb(1)-N(2)-C(7') | 150.2(11) | C(5)-S(2)-C(5')-C(6')  | -43.0(12)  |
| S(1)-Pb(1)-N(2)-C(6') | 82.4(8)   | Pb(1)-S(2)-C(5')-C(6') | 42.4(19)   |
| S(2)-Pb(1)-N(2)-C(6') | -14.5(8)  | C(7')-N(2)-C(6')-C(5') | -73(2)     |
| N(1)-Pb(1)-N(2)-C(6') | 29.1(10)  | C(8)-N(2)-C(6')-C(5')  | 163.6(19)  |
| S(1)-Pb(1)-N(2)-C(8)  | -15.7(6)  | C(7)-N(2)-C(6')-C(5')  | -76(2)     |
| S(2)-Pb(1)-N(2)-C(8)  | -112.7(6) | C(6)-N(2)-C(6')-C(5')  | -49.8(19)  |
| N(1)-Pb(1)-N(2)-C(8)  | -69.0(8)  | C(8')-N(2)-C(6')-C(5') | 162(2)     |
| S(1)-Pb(1)-N(2)-C(7)  | -134.9(6) | Pb(1)-N(2)-C(6')-C(5') | 47.2(18)   |
| S(2)-Pb(1)-N(2)-C(7)  | 128.1(6)  | S(2)-C(5')-C(6')-N(2)  | -66(2)     |
| N(1)-Pb(1)-N(2)-C(7)  | 171.8(8)  |                        |            |

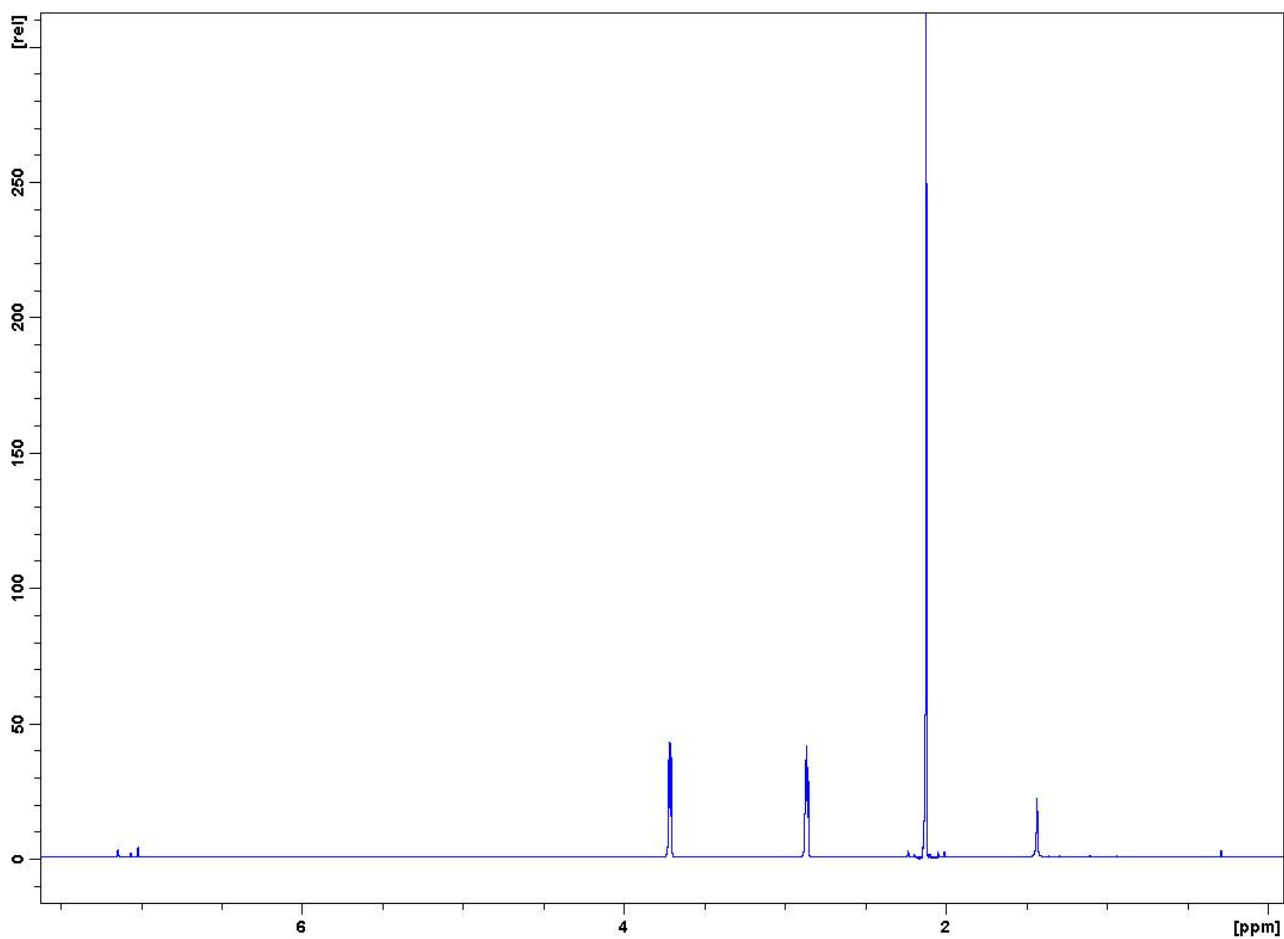

**Fig. S1.** 600.2 MHz <sup>1</sup>H NMR spectrum of **4** at 298 K.



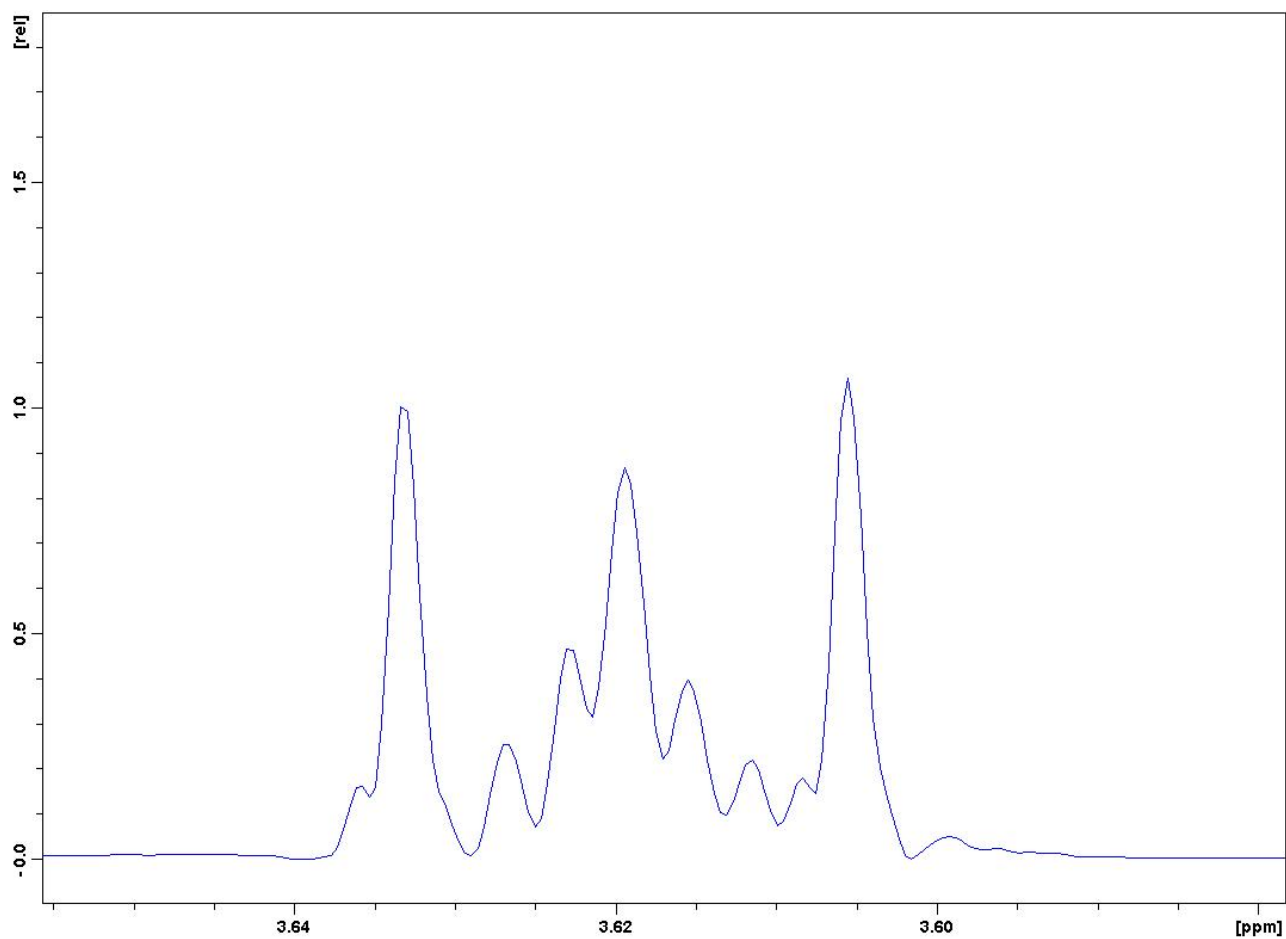

**Fig. S2.** A portion of 400.1 MHz  $^1\text{H}$  NMR spectrum of **4** - the  $\text{SCH}_2\text{CH}_2\text{N}$  multiplet (*pseudotriplet*).

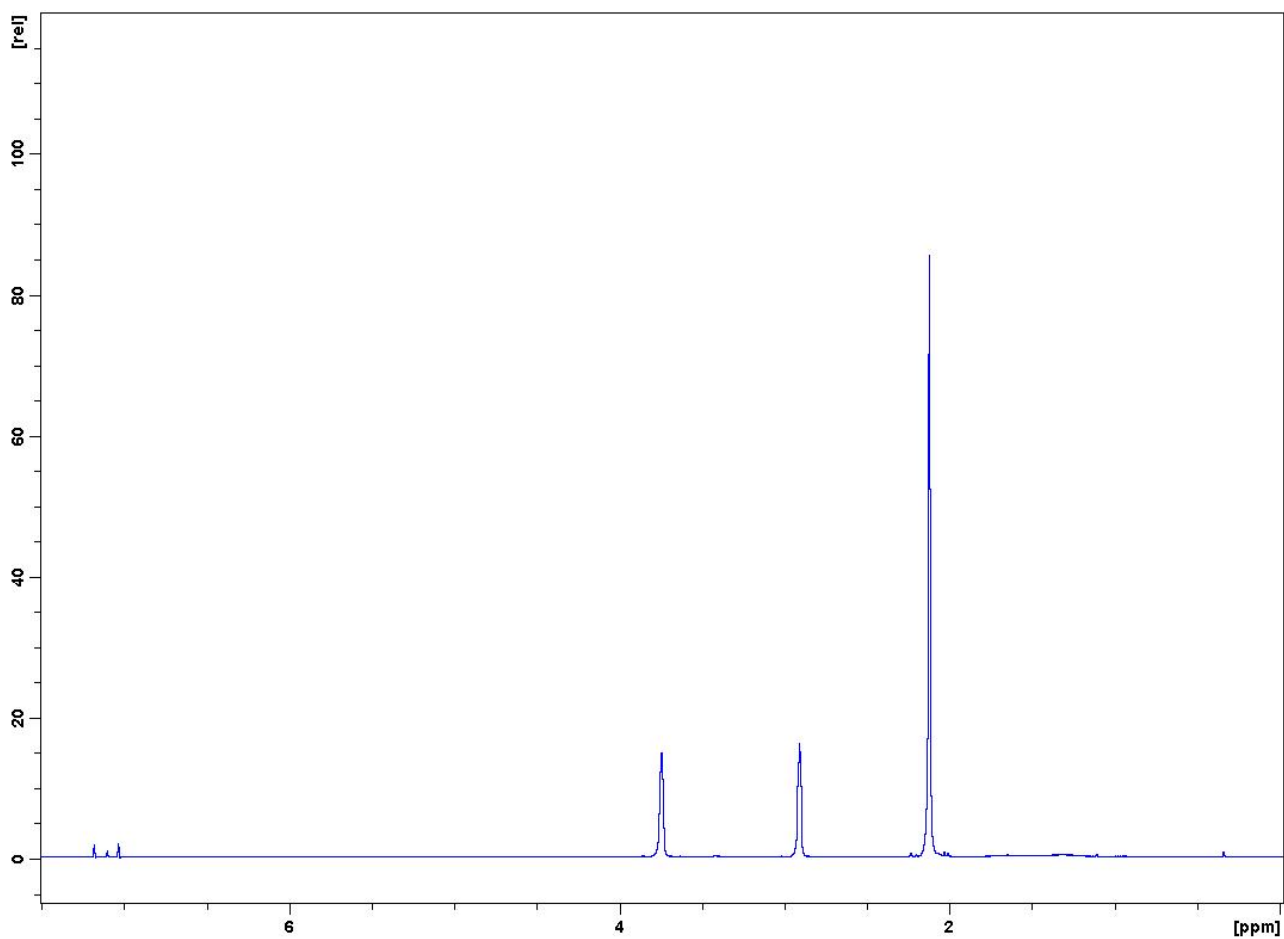

**Fig. S3.** 600.2 MHz  $^1\text{H}$  NMR spectrum of **4** at 233 K.

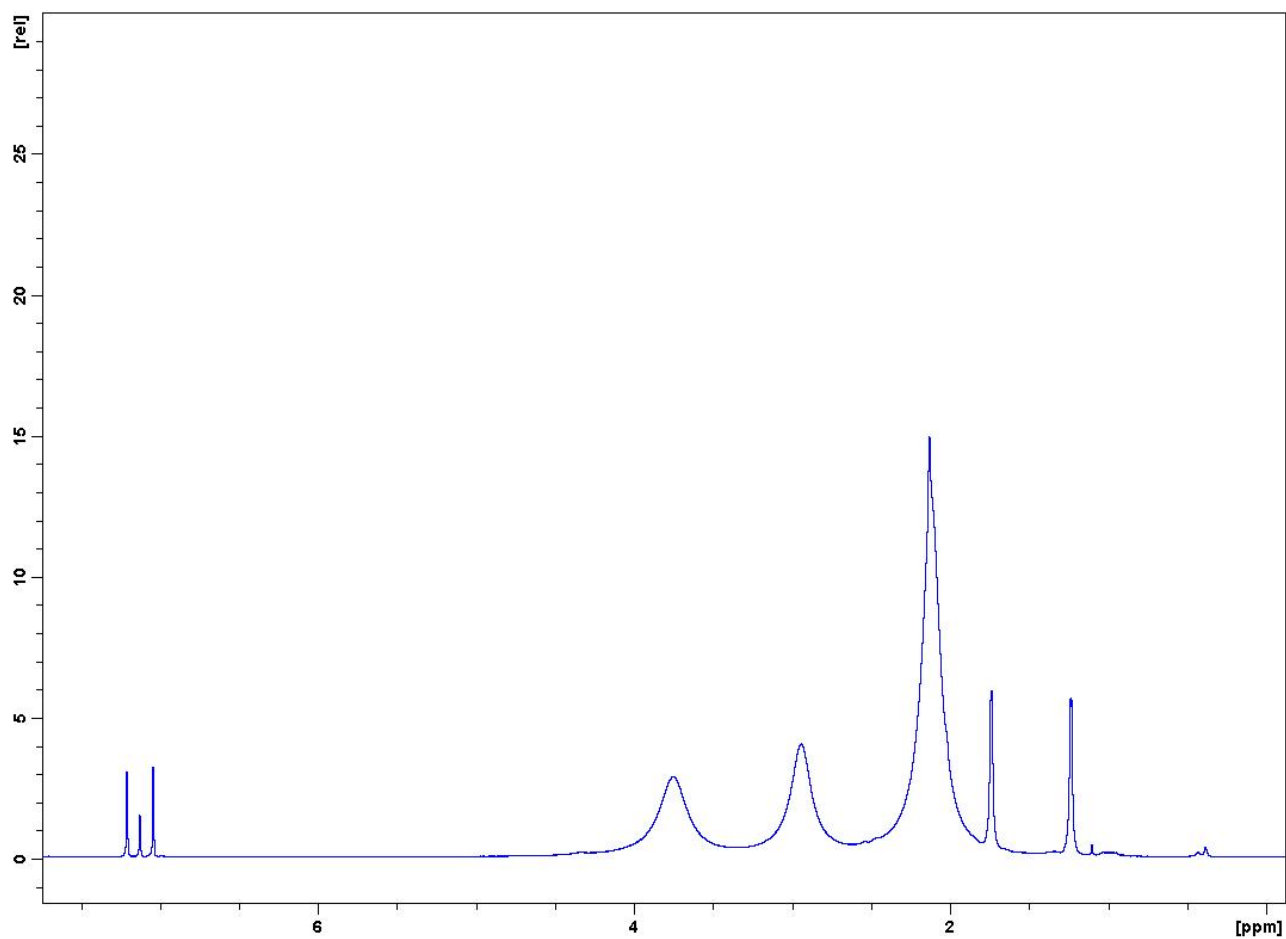

**Fig. S4.** 600.2 MHz  $^1\text{H}$  NMR spectrum of **4** at 203 K.

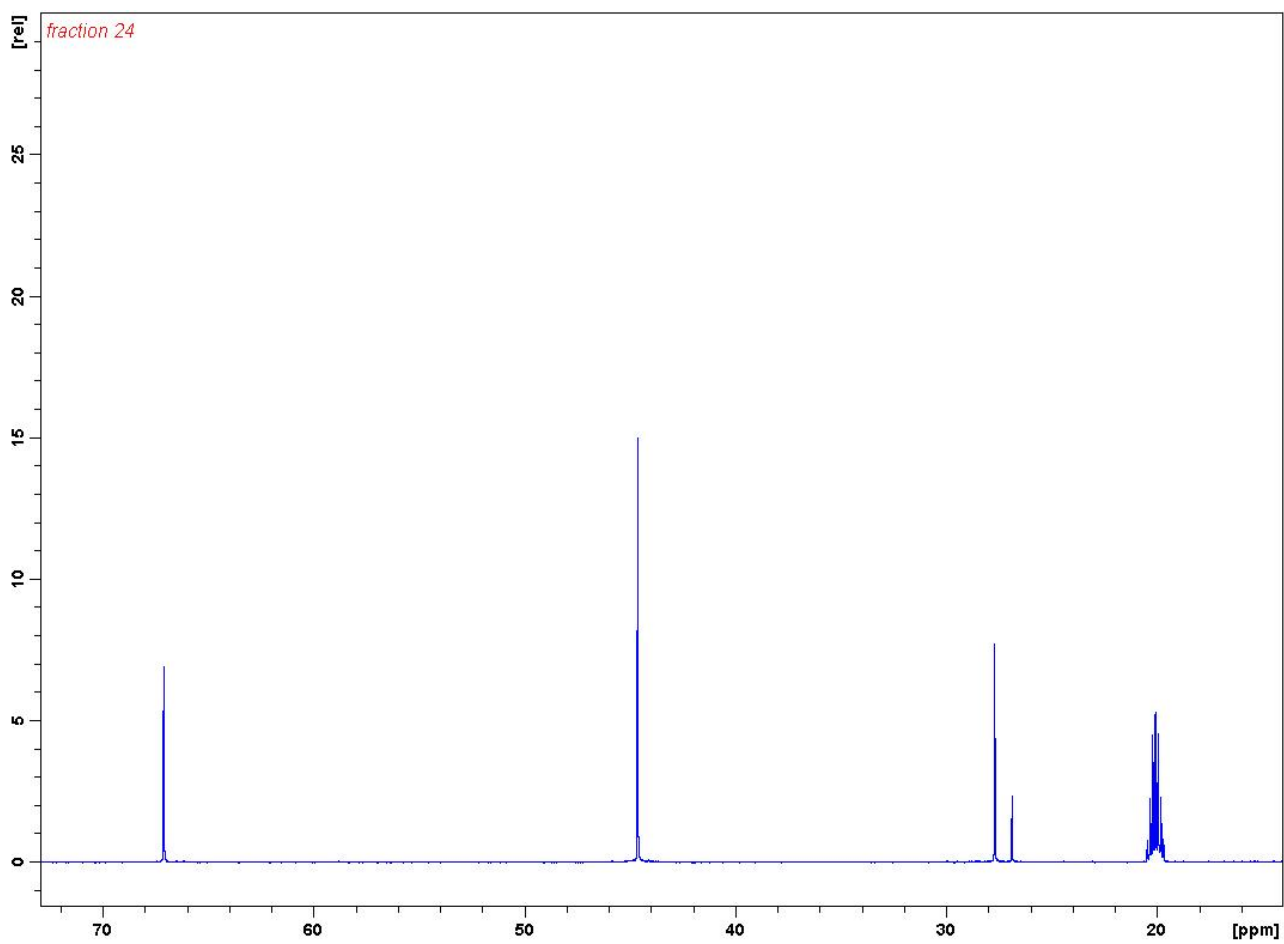

**Fig. S5.** 150.9 MHz  $^{13}\text{C}$  NMR spectrum of **4** at 298 K.

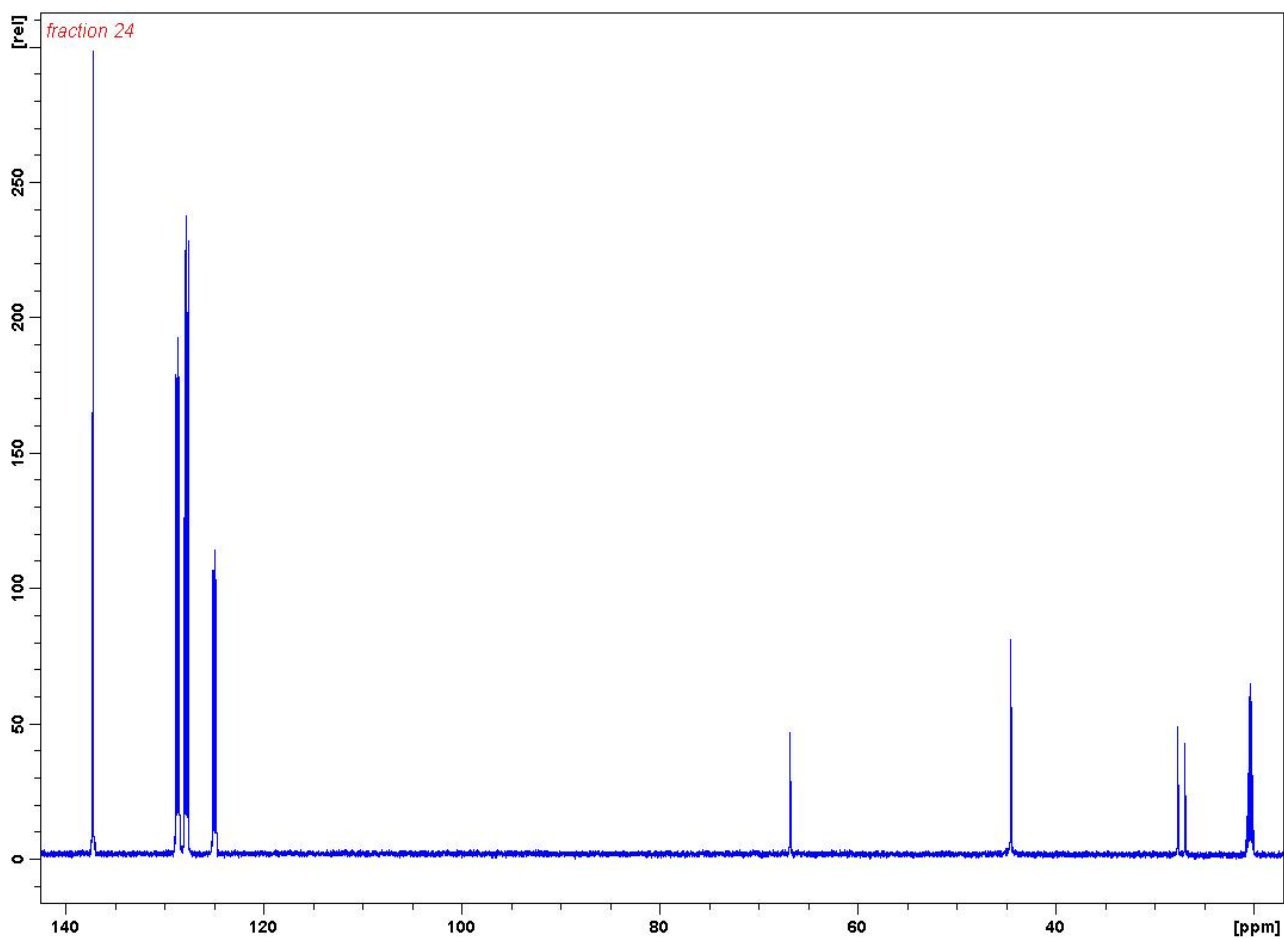

Fig. S6. 150.9 MHz  $^{13}\text{C}$  NMR spectrum of **4** at 233 K.

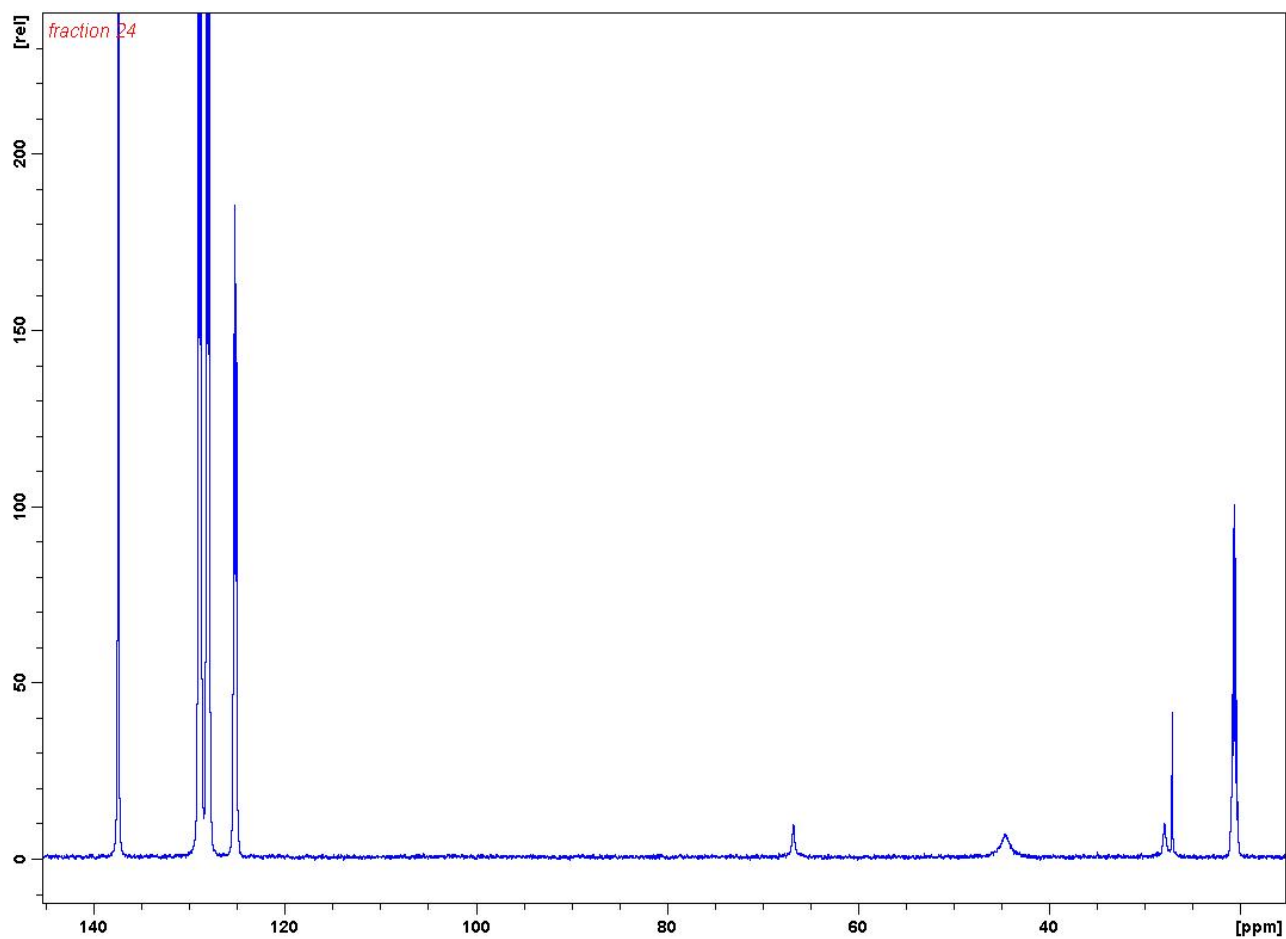

Fig. S7. 150.9 MHz  $^{13}\text{C}$  NMR spectrum of 4 at 203 K.

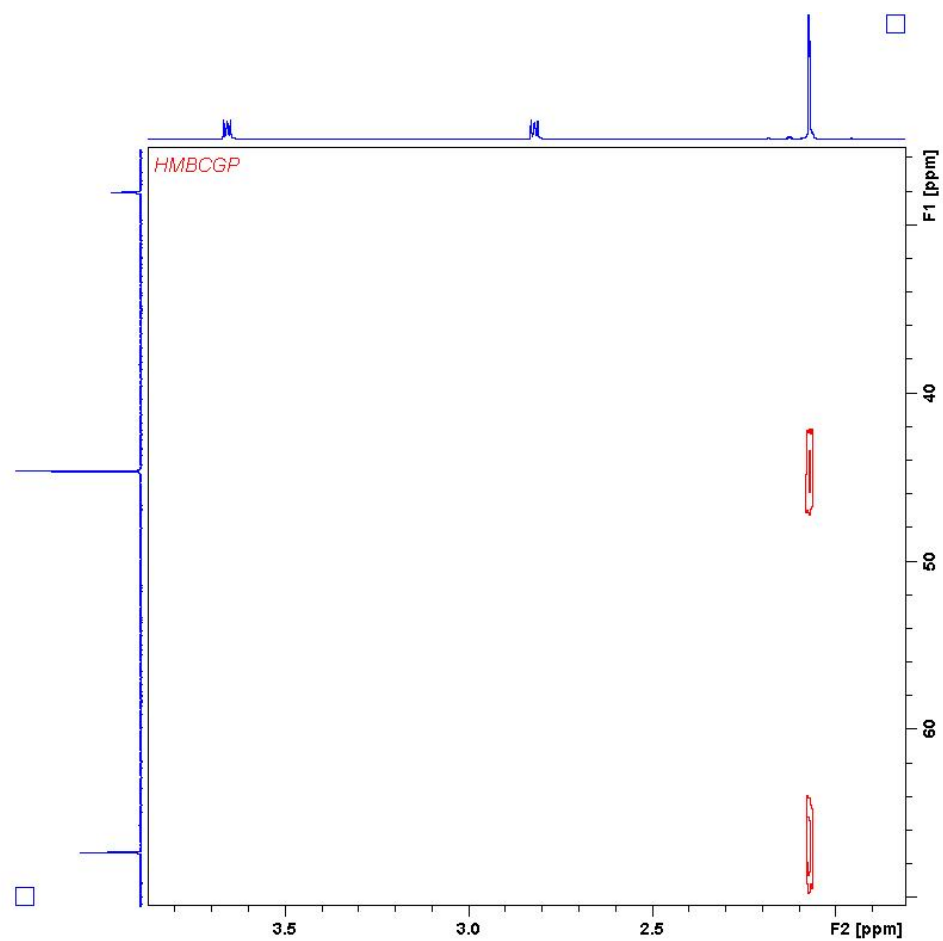

**Fig. S8.** 600.2 MHz HMBC spectrum of **4** at 298 K.

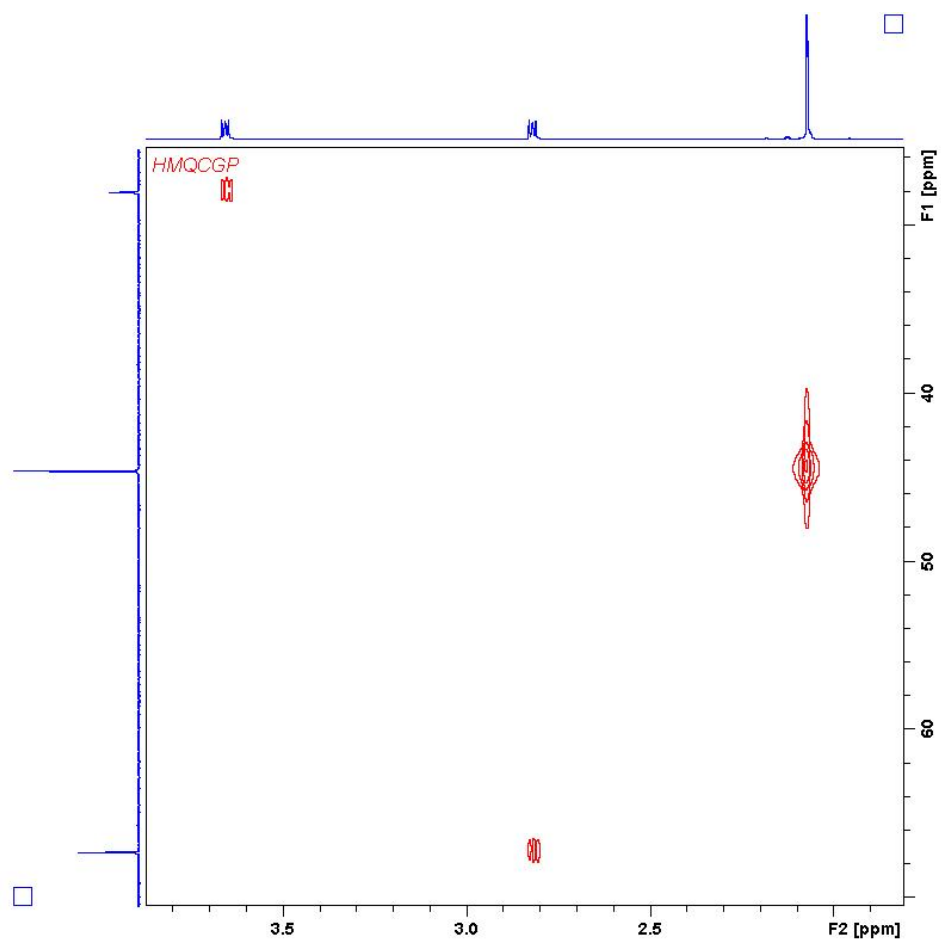

**Fig. S9.** 600.2 MHz HMQC spectrum of **4** at 298 K.



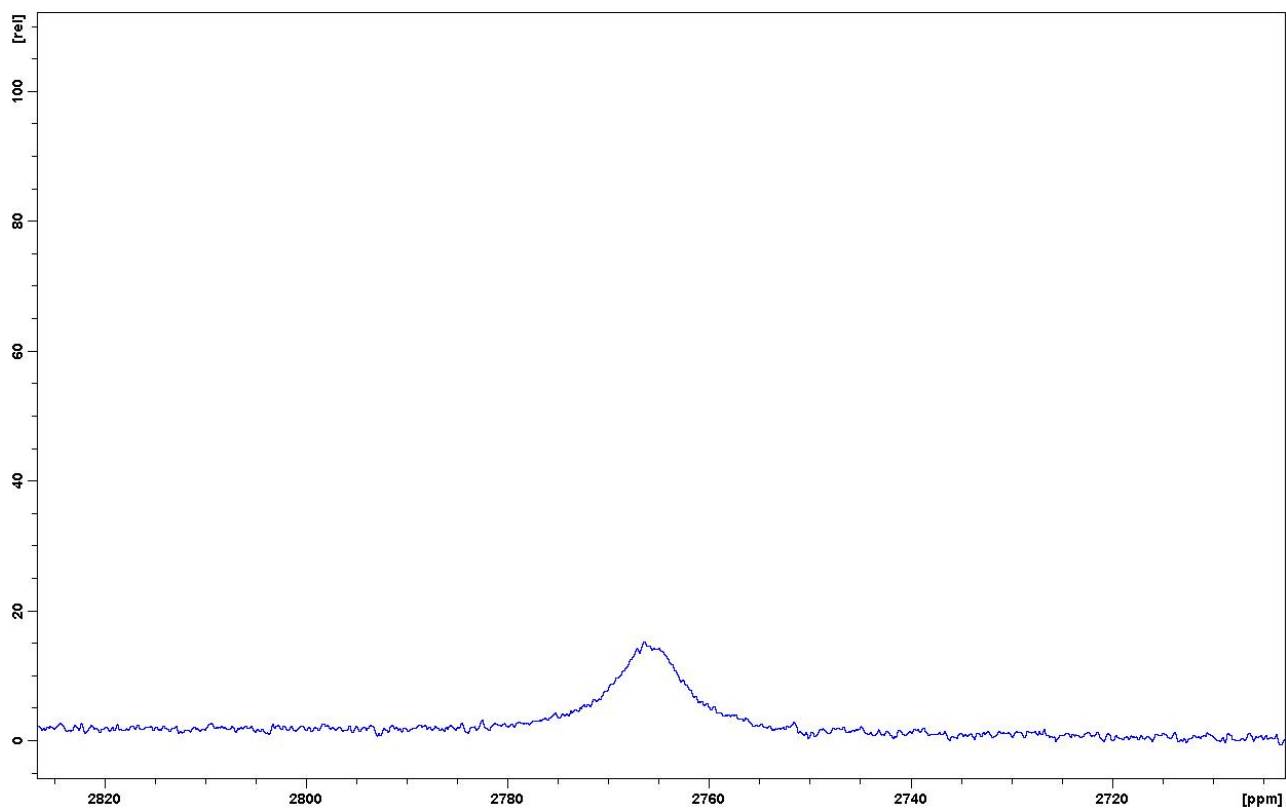

**Fig. S10.** 83.7 MHz  $^{207}\text{Pb}$  spectrum of **4** at 298 K.

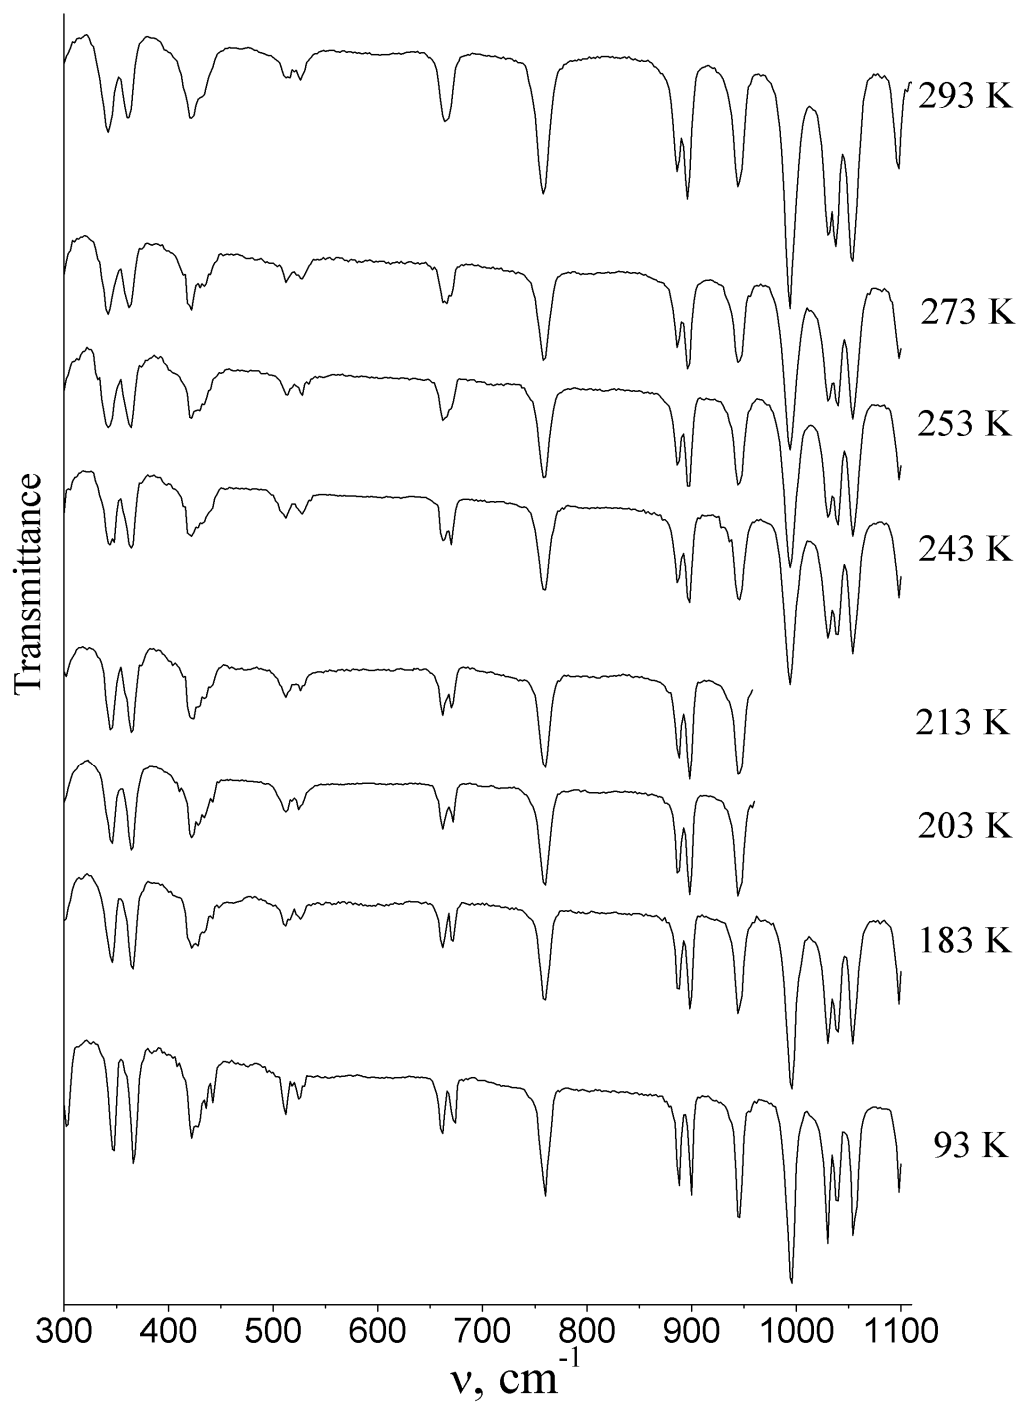

**Fig S11.** Variable-temperature IR spectra of **4** crystalline film on CsI plate.

## DFT calculations

All theoretical calculations of the geometry and normal coordinate analysis (NCA) for both **AA** and **AB** conformers of **4** were performed in Gaussian 03 [S1] program at the MP2 [S2] and DFT level of theory using the PBE [S3], PBE0 [S4], M05-2X [S5] and B3LYP [S6] functionals. 6-311G(d,p) [S7] valence basis set for C, N and S atoms and cc-pVTZ-pp [S8] effective core potentials for Pb atom were utilized. Calculation of potential energy distribution (PED) were carried out with using NCA99 program [S9].

- [S1]. Gaussian 03, Revision E.01, M. J. Frisch, G. W. Trucks, H. B. Schlegel, G. E. Scuseria, M. A. Robb, J. R. Cheeseman, J. A. Montgomery, Jr., T. Vreven, K. N. Kudin, J. C. Burant, J. M. Millam, S. S. Iyengar, J. Tomasi, V. Barone, B. Mennucci, M. Cossi, G. Scalmani, N. Rega, G. A. Petersson, H. Nakatsuji, M. Hada, M. Ehara, K. Toyota, R. Fukuda, J. Hasegawa, M. Ishida, T. Nakajima, Y. Honda, O. Kitao, H. Nakai, M. Klene, X. Li, J. E. Knox, H. P. Hratchian, J. B. Cross, V. Bakken, C. Adamo, J. Jaramillo, R. Gomperts, R. E. Stratmann, O. Yazyev, A. J. Austin, R. Cammi, C. Pomelli, J. W. Ochterski, P. Y. Ayala, K. Morokuma, G. A. Voth, P. Salvador, J. J. Dannenberg, V. G. Zakrzewski, S. Dapprich, A. D. Daniels, M. C. Strain, O. Farkas, D. K. Malick, A. D. Rabuck, K. Raghavachari, J. B. Foresman, J. V. Ortiz, Q. Cui, A. G. Baboul, S. Clifford, J. Cioslowski, B. B. Stefanov, G. Liu, A. Liashenko, P. Piskorz, I. Komaromi, R. L. Martin, D. J. Fox, T. Keith, M. A. Al-Laham, C. Y. Peng, A. Nanayakkara, M. Challacombe, P. M. W. Gill, B. Johnson, W. Chen, M. W. Wong, C. Gonzalez, J. A. Pople, Gaussian, Inc., Wallingford CT, 2004.
- [S2]. C. Moller, M. S. Plesset, *Phys. Rev.*, 1934, **46**, 618.
- [S3]. J. P. Perdew, K. Burke, M. Ernzerhof, *Phys. Rev. Lett.*, 1996, **77**, 3865.
- [S4]. J. P. Perdew, K. Burke, M. Ernzerhof, *Phys. Rev. Lett.*, 1997, **78**, 1396.
- [S5]. Y. Zhao, N. E. Schultz, D.G. Truhlar, *J. Chem. Theory Comput.*, 2006, **2**, 364.
- [S6]. A. D. Becke, *J. Chem. Phys.*, 1993, **98**, 5648.
- [S7]. (a) R. Krishnan, J. S. Binkley, R. Seeger, J. A. Pople, *J. Chem. Phys.*, 1980, **72**, 650.  
(b) A. D. McLean, G. S. Chandler, *J. Chem. Phys.*, 1980, **72**, 5639.
- [S8]. (a) K. A. Peterson, *J. Chem. Phys.*, 2003, **119**, 11099. (b) B. Metz, H. Stoll, M. Dolg, *J. Chem. Phys.*, 2000, **113**, 2563.
- [S9]. V. A. Sipachev, *J. Mol. Struct. (Theochem)*, 1985, **121**, 143.

**Table S19.** Experimental and calculated (PBE) frequencies of conformers *AA* and *AB*.

| Experimental            |                      | Calculated |     |           |     | Forms of vibration modes and PEDs    |
|-------------------------|----------------------|------------|-----|-----------|-----|--------------------------------------|
| Raman, cm <sup>-1</sup> | IR, cm <sup>-1</sup> | <i>AB</i>  |     | <i>AA</i> |     |                                      |
| 344                     | 342                  | 336        | A>  | 325       | A-A |                                      |
| 363                     | 360                  | 352        | B>  | 337       | A+A |                                      |
| 514                     | 510                  | 496        | B   | 519       | A+A |                                      |
| 525                     | 526                  | 518        | A   | 520       | A-A |                                      |
| 655                     | 664                  | 649        | A   | 650       | A-A | νC-S 75%                             |
|                         |                      | 651        | B   | 650       | A+A |                                      |
|                         | 758                  | 747        | A-B | 749       | A-A | ν <sup>s</sup> C-N 32% + δX-C-H 28%  |
| 764                     |                      | 752        | A+B | 754       | A+A |                                      |
| 888                     | 886                  | 878        | A   | 875       | A-A | ν <sup>s</sup> C-N 30% + δX-C-H 41%  |
| 898                     | 896                  | 888        | B   | 877       | A+A |                                      |
| 948                     | 944                  | 921        | B   | 938       | A+A | δCH <sub>2</sub> 72% + νC-N 11%      |
|                         |                      | 937        | A   | 938       | A-A |                                      |
| 996                     | 994                  | 980        | B   | 984       | A-A | ν <sup>as</sup> C-N 40% + δX-C-H 42% |
|                         |                      | 983        | A   | 985       | A+A |                                      |
| 1209                    |                      | 1200       | B   | 1208      | A-A |                                      |
| 1215                    | 1214                 | 1209       | A   | 1209      | A+A |                                      |

**Table S20.** Calculated structural parameters (Å and deg.) for conformers *AA* and *AB* using PBE0 functional.

|                                   | <i>AA</i> | <i>AB</i> |
|-----------------------------------|-----------|-----------|
| Pb-S <sub>1</sub>                 | 2.633     | 2.614     |
| Pb-S <sub>2</sub>                 | 2.633     | 2.627     |
| Pb-N <sub>1</sub>                 | 2.641     | 2.731     |
| Pb-N <sub>2</sub>                 | 2.641     | 2.640     |
| S <sub>1</sub> -Pb-S <sub>2</sub> | 101.4     | 97.35     |
| N <sub>1</sub> -Pb-N <sub>2</sub> | 146.65    | 152.54    |

**Table S21.** Calculated energetic parameters ( $\Delta E$ ,  $\Delta H$  and  $\Delta G$ , kcal/mol) for **4**  
( $T = 298$  K, **TS** – transition state from **AA** to **AB**)

| Conformer     | $\Delta E$ | $\Delta H$ | $\Delta G$ |
|---------------|------------|------------|------------|
| <b>PBE</b>    |            |            |            |
| <i>AA</i>     | 0          | 0          | 0          |
| <i>AB</i>     | 1.51       | 0.27       | 2.75       |
| <i>TS</i>     | 3.49       | 3.11       | 3.8        |
| <b>PBE0</b>   |            |            |            |
| <i>AA</i>     | 0          | 0          | 0          |
| <i>AB</i>     | -0.10      | -0.09      | -0.12      |
| <i>TS</i>     | 3.72       | 3.33       | 4.11       |
| <b>B3LYP</b>  |            |            |            |
| <i>AA</i>     | 0          | 0          | 0          |
| <i>AB</i>     | -0.37      | -0.36      | -0.37      |
| <i>TS</i>     | 3.81       | 3.41       | 4.32       |
| <b>M05-2X</b> |            |            |            |
| <i>AA</i>     | 0          | 0          | 0          |
| <i>AB</i>     | 0.24       | 0.22       | 0.24       |
| <i>TS</i>     | 3.98       | 3.57       | 4.56       |
| <b>MP2</b>    |            |            |            |
| <i>AA</i>     | 0          | 0          | 0          |
| <i>AB</i>     | -0.39      |            |            |
